# Supplementary material
Source: MDPI journal article supplement (https://www.mdpi.com/2076-3417/14/6/2457)
Supplement: s1 [file s1]

# Odor Impact Assessment via Dispersion Model: Comparison of Different Input

## Meteorological Datasets

Francesca Tagliaferri <sup>1</sup>, Laura Facagni <sup>1</sup>, Marzio Invernizzi <sup>1\*</sup>, Adrian Luis Ferrer Hernández <sup>2</sup>, Anel Hernández-Garcés <sup>3</sup> and Selenia Sironi <sup>1</sup>

## SUPPLEMENTARY MATERIAL

### Odour concentration values - 98th percentile on annual basis - on discrete receptors

#### Point source – Italy

| UTM E<br>[km] | UTM N<br>[km] | Distance<br>[m] | Direction<br>[°] | OBS<br>C <sub>98</sub><br>[ouE/m <sup>3</sup> ] | HYBRID<br>C <sub>98</sub><br>[ouE/m <sup>3</sup> ] | NO-OBS<br>C <sub>98</sub><br>[ouE/m <sup>3</sup> ] |
|---------------|---------------|-----------------|------------------|-------------------------------------------------|----------------------------------------------------|----------------------------------------------------|
| 519.15        | 5018.601      | 50              | 0                | 5.65                                            | 6.19                                               | 5.40                                               |
| 519.167       | 5018.598      | 50              | 20               | 5.43                                            | 6.06                                               | 5.80                                               |
| 519.182       | 5018.589      | 50              | 40               | 5.98                                            | 6.62                                               | 6.63                                               |
| 519.193       | 5018.576      | 50              | 60               | 6.70                                            | 7.30                                               | 7.02                                               |
| 519.199       | 5018.559      | 50              | 80               | 6.94                                            | 7.74                                               | 7.07                                               |
| 519.199       | 5018.542      | 50              | 100              | 6.32                                            | 6.94                                               | 6.96                                               |
| 519.193       | 5018.525      | 50              | 120              | 5.87                                            | 6.06                                               | 6.55                                               |
| 519.182       | 5018.512      | 50              | 140              | 5.41                                            | 5.39                                               | 6.65                                               |
| 519.167       | 5018.503      | 50              | 160              | 5.12                                            | 4.62                                               | 6.36                                               |
| 519.15        | 5018.5        | 50              | 180              | 5.00                                            | 4.48                                               | 5.32                                               |
| 519.133       | 5018.503      | 50              | 200              | 4.96                                            | 4.53                                               | 5.01                                               |
| 519.118       | 5018.512      | 50              | 220              | 5.50                                            | 5.15                                               | 5.41                                               |
| 519.107       | 5018.525      | 50              | 240              | 6.08                                            | 6.19                                               | 6.21                                               |
| 519.101       | 5018.542      | 50              | 260              | 6.73                                            | 7.22                                               | 7.29                                               |
| 519.101       | 5018.559      | 50              | 280              | 7.14                                            | 7.85                                               | 7.63                                               |
| 519.107       | 5018.576      | 50              | 300              | 6.93                                            | 7.71                                               | 6.72                                               |
| 519.118       | 5018.589      | 50              | 320              | 6.81                                            | 7.45                                               | 5.95                                               |
| 519.133       | 5018.598      | 50              | 340              | 6.11                                            | 6.78                                               | 5.53                                               |
| 519.15        | 5018.65       | 100             | 0                | 3.05                                            | 2.95                                               | 2.64                                               |
| 519.184       | 5018.645      | 100             | 20               | 3.03                                            | 2.99                                               | 2.95                                               |
| 519.214       | 5018.627      | 100             | 40               | 3.38                                            | 3.43                                               | 3.83                                               |
| 519.237       | 5018.601      | 100             | 60               | 4.05                                            | 4.08                                               | 4.38                                               |
| 519.248       | 5018.568      | 100             | 80               | 4.27                                            | 4.29                                               | 4.55                                               |

|         |          |     |     |      |      |      |
|---------|----------|-----|-----|------|------|------|
| 519.248 | 5018.533 | 100 | 100 | 3.56 | 3.69 | 4.41 |
| 519.237 | 5018.5   | 100 | 120 | 3.14 | 3.13 | 4.00 |
| 519.214 | 5018.474 | 100 | 140 | 2.86 | 2.82 | 3.93 |
| 519.184 | 5018.457 | 100 | 160 | 2.69 | 2.52 | 3.79 |
| 519.15  | 5018.451 | 100 | 180 | 2.69 | 2.41 | 3.18 |
| 519.116 | 5018.457 | 100 | 200 | 2.69 | 2.34 | 2.97 |
| 519.086 | 5018.474 | 100 | 220 | 3.13 | 2.67 | 3.19 |
| 519.063 | 5018.5   | 100 | 240 | 3.63 | 3.31 | 3.87 |
| 519.052 | 5018.533 | 100 | 260 | 4.06 | 4.33 | 4.68 |
| 519.052 | 5018.568 | 100 | 280 | 4.31 | 4.81 | 4.93 |
| 519.063 | 5018.601 | 100 | 300 | 4.03 | 4.31 | 4.07 |
| 519.086 | 5018.627 | 100 | 320 | 3.72 | 3.75 | 3.17 |
| 519.116 | 5018.645 | 100 | 340 | 3.19 | 3.20 | 2.82 |
| 519.15  | 5018.701 | 150 | 0   | 1.76 | 1.56 | 1.46 |
| 519.201 | 5018.691 | 150 | 20  | 1.76 | 1.58 | 1.68 |
| 519.246 | 5018.666 | 150 | 40  | 1.96 | 1.88 | 2.23 |
| 519.28  | 5018.625 | 150 | 60  | 2.56 | 2.42 | 2.79 |
| 519.298 | 5018.577 | 150 | 80  | 2.76 | 2.60 | 2.94 |
| 519.298 | 5018.524 | 150 | 100 | 2.17 | 2.15 | 2.84 |
| 519.28  | 5018.476 | 150 | 120 | 1.80 | 1.79 | 2.43 |
| 519.246 | 5018.436 | 150 | 140 | 1.70 | 1.63 | 2.29 |
| 519.201 | 5018.41  | 150 | 160 | 1.56 | 1.53 | 2.24 |
| 519.15  | 5018.4   | 150 | 180 | 1.58 | 1.37 | 1.90 |
| 519.099 | 5018.41  | 150 | 200 | 1.59 | 1.39 | 1.83 |
| 519.054 | 5018.436 | 150 | 220 | 1.84 | 1.63 | 1.89 |
| 519.02  | 5018.476 | 150 | 240 | 2.19 | 2.03 | 2.49 |
| 519.002 | 5018.524 | 150 | 260 | 2.55 | 2.60 | 3.12 |
| 519.002 | 5018.577 | 150 | 280 | 2.66 | 2.87 | 3.24 |
| 519.02  | 5018.625 | 150 | 300 | 2.36 | 2.34 | 2.47 |
| 519.054 | 5018.666 | 150 | 320 | 2.12 | 1.98 | 1.80 |
| 519.099 | 5018.691 | 150 | 340 | 1.81 | 1.72 | 1.61 |
| 519.15  | 5018.75  | 200 | 0   | 1.08 | 0.90 | 0.87 |
| 519.218 | 5018.738 | 200 | 20  | 1.12 | 0.97 | 1.01 |
| 519.279 | 5018.704 | 200 | 40  | 1.26 | 1.19 | 1.42 |
| 519.323 | 5018.65  | 200 | 60  | 1.88 | 1.67 | 1.92 |
| 519.347 | 5018.585 | 200 | 80  | 2.08 | 1.89 | 2.12 |
| 519.347 | 5018.516 | 200 | 100 | 1.50 | 1.49 | 1.91 |
| 519.323 | 5018.451 | 200 | 120 | 1.14 | 1.18 | 1.58 |
| 519.279 | 5018.397 | 200 | 140 | 1.06 | 1.09 | 1.52 |
| 519.218 | 5018.362 | 200 | 160 | 0.95 | 0.98 | 1.47 |
| 519.15  | 5018.351 | 200 | 180 | 0.97 | 0.91 | 1.26 |
| 519.082 | 5018.362 | 200 | 200 | 0.97 | 0.86 | 1.20 |
| 519.021 | 5018.397 | 200 | 220 | 1.19 | 1.07 | 1.28 |
| 518.977 | 5018.451 | 200 | 240 | 1.46 | 1.41 | 1.77 |

|         |          |     |     |      |      |      |
|---------|----------|-----|-----|------|------|------|
| 518.953 | 5018.516 | 200 | 260 | 1.75 | 1.83 | 2.17 |
| 518.953 | 5018.585 | 200 | 280 | 1.81 | 2.00 | 2.26 |
| 518.977 | 5018.65  | 200 | 300 | 1.55 | 1.51 | 1.64 |
| 519.021 | 5018.704 | 200 | 320 | 1.34 | 1.13 | 1.11 |
| 519.082 | 5018.738 | 200 | 340 | 1.12 | 0.99 | 0.96 |
| 519.15  | 5018.951 | 400 | 0   | 0.37 | 0.28 | 0.29 |
| 519.287 | 5018.926 | 400 | 20  | 0.38 | 0.30 | 0.33 |
| 519.407 | 5018.857 | 400 | 40  | 0.43 | 0.40 | 0.50 |
| 519.496 | 5018.75  | 400 | 60  | 0.69 | 0.61 | 0.75 |
| 519.544 | 5018.62  | 400 | 80  | 0.82 | 0.67 | 0.82 |
| 519.544 | 5018.481 | 400 | 100 | 0.56 | 0.57 | 0.78 |
| 519.496 | 5018.351 | 400 | 120 | 0.39 | 0.44 | 0.61 |
| 519.407 | 5018.244 | 400 | 140 | 0.38 | 0.41 | 0.58 |
| 519.287 | 5018.175 | 400 | 160 | 0.34 | 0.36 | 0.57 |
| 519.15  | 5018.15  | 400 | 180 | 0.32 | 0.31 | 0.47 |
| 519.013 | 5018.175 | 400 | 200 | 0.34 | 0.30 | 0.49 |
| 518.893 | 5018.244 | 400 | 220 | 0.42 | 0.38 | 0.59 |
| 518.804 | 5018.351 | 400 | 240 | 0.53 | 0.49 | 0.77 |
| 518.756 | 5018.481 | 400 | 260 | 0.66 | 0.74 | 0.91 |
| 518.756 | 5018.62  | 400 | 280 | 0.65 | 0.77 | 0.86 |
| 518.804 | 5018.75  | 400 | 300 | 0.54 | 0.54 | 0.57 |
| 518.893 | 5018.857 | 400 | 320 | 0.46 | 0.35 | 0.38 |
| 519.013 | 5018.926 | 400 | 340 | 0.38 | 0.31 | 0.33 |
| 519.15  | 5019.15  | 600 | 0   | 0.19 | 0.15 | 0.16 |
| 519.355 | 5019.114 | 600 | 20  | 0.20 | 0.15 | 0.18 |
| 519.536 | 5019.01  | 600 | 40  | 0.22 | 0.21 | 0.28 |
| 519.67  | 5018.851 | 600 | 60  | 0.36 | 0.35 | 0.46 |
| 519.741 | 5018.655 | 600 | 80  | 0.46 | 0.38 | 0.51 |
| 519.741 | 5018.446 | 600 | 100 | 0.29 | 0.31 | 0.43 |
| 519.67  | 5018.25  | 600 | 120 | 0.21 | 0.25 | 0.36 |
| 519.536 | 5018.091 | 600 | 140 | 0.20 | 0.22 | 0.32 |
| 519.355 | 5017.987 | 600 | 160 | 0.18 | 0.20 | 0.32 |
| 519.15  | 5017.951 | 600 | 180 | 0.17 | 0.18 | 0.28 |
| 518.945 | 5017.987 | 600 | 200 | 0.18 | 0.17 | 0.28 |
| 518.764 | 5018.091 | 600 | 220 | 0.22 | 0.20 | 0.37 |
| 518.63  | 5018.25  | 600 | 240 | 0.29 | 0.27 | 0.47 |
| 518.559 | 5018.446 | 600 | 260 | 0.37 | 0.41 | 0.57 |
| 518.559 | 5018.655 | 600 | 280 | 0.35 | 0.44 | 0.49 |
| 518.63  | 5018.851 | 600 | 300 | 0.29 | 0.27 | 0.31 |
| 518.764 | 5019.01  | 600 | 320 | 0.24 | 0.19 | 0.20 |
| 518.945 | 5019.114 | 600 | 340 | 0.19 | 0.16 | 0.17 |
| 519.15  | 5019.351 | 800 | 0   | 0.12 | 0.09 | 0.10 |
| 519.424 | 5019.302 | 800 | 20  | 0.13 | 0.10 | 0.12 |
| 519.664 | 5019.163 | 800 | 40  | 0.14 | 0.13 | 0.18 |

|         |          |      |     |      |      |      |
|---------|----------|------|-----|------|------|------|
| 519.843 | 5018.951 | 800  | 60  | 0.23 | 0.22 | 0.32 |
| 519.938 | 5018.689 | 800  | 80  | 0.30 | 0.26 | 0.37 |
| 519.938 | 5018.412 | 800  | 100 | 0.20 | 0.21 | 0.33 |
| 519.843 | 5018.15  | 800  | 120 | 0.13 | 0.16 | 0.24 |
| 519.664 | 5017.938 | 800  | 140 | 0.14 | 0.15 | 0.22 |
| 519.424 | 5017.799 | 800  | 160 | 0.12 | 0.14 | 0.22 |
| 519.15  | 5017.75  | 800  | 180 | 0.11 | 0.12 | 0.19 |
| 518.876 | 5017.799 | 800  | 200 | 0.12 | 0.12 | 0.20 |
| 518.636 | 5017.938 | 800  | 220 | 0.14 | 0.14 | 0.28 |
| 518.457 | 5018.15  | 800  | 240 | 0.19 | 0.18 | 0.35 |
| 518.362 | 5018.412 | 800  | 260 | 0.25 | 0.27 | 0.39 |
| 518.362 | 5018.689 | 800  | 280 | 0.23 | 0.30 | 0.33 |
| 518.457 | 5018.951 | 800  | 300 | 0.19 | 0.18 | 0.21 |
| 518.636 | 5019.163 | 800  | 320 | 0.16 | 0.12 | 0.13 |
| 518.876 | 5019.302 | 800  | 340 | 0.13 | 0.11 | 0.11 |
| 519.15  | 5019.55  | 1000 | 0   | 0.08 | 0.07 | 0.07 |
| 519.492 | 5019.49  | 1000 | 20  | 0.09 | 0.07 | 0.08 |
| 519.793 | 5019.316 | 1000 | 40  | 0.10 | 0.10 | 0.14 |
| 520.016 | 5019.05  | 1000 | 60  | 0.17 | 0.15 | 0.25 |
| 520.135 | 5018.724 | 1000 | 80  | 0.21 | 0.18 | 0.28 |
| 520.135 | 5018.377 | 1000 | 100 | 0.15 | 0.15 | 0.25 |
| 520.016 | 5018.05  | 1000 | 120 | 0.10 | 0.12 | 0.19 |
| 519.793 | 5017.785 | 1000 | 140 | 0.10 | 0.11 | 0.17 |
| 519.492 | 5017.611 | 1000 | 160 | 0.09 | 0.10 | 0.17 |
| 519.15  | 5017.55  | 1000 | 180 | 0.08 | 0.09 | 0.14 |
| 518.808 | 5017.611 | 1000 | 200 | 0.08 | 0.08 | 0.15 |
| 518.507 | 5017.785 | 1000 | 220 | 0.10 | 0.10 | 0.21 |
| 518.284 | 5018.05  | 1000 | 240 | 0.14 | 0.13 | 0.27 |
| 518.165 | 5018.377 | 1000 | 260 | 0.19 | 0.21 | 0.30 |
| 518.165 | 5018.724 | 1000 | 280 | 0.17 | 0.22 | 0.25 |
| 518.284 | 5019.05  | 1000 | 300 | 0.13 | 0.13 | 0.15 |
| 518.507 | 5019.316 | 1000 | 320 | 0.11 | 0.08 | 0.09 |
| 518.808 | 5019.49  | 1000 | 340 | 0.09 | 0.07 | 0.08 |
| 519.15  | 5019.75  | 1200 | 0   | 0.07 | 0.05 | 0.06 |
| 519.56  | 5019.678 | 1200 | 20  | 0.07 | 0.06 | 0.07 |
| 519.921 | 5019.47  | 1200 | 40  | 0.08 | 0.07 | 0.11 |
| 520.189 | 5019.15  | 1200 | 60  | 0.13 | 0.12 | 0.21 |
| 520.332 | 5018.759 | 1200 | 80  | 0.16 | 0.14 | 0.24 |
| 520.332 | 5018.342 | 1200 | 100 | 0.11 | 0.12 | 0.19 |
| 520.189 | 5017.951 | 1200 | 120 | 0.08 | 0.10 | 0.16 |
| 519.921 | 5017.631 | 1200 | 140 | 0.07 | 0.08 | 0.12 |
| 519.56  | 5017.423 | 1200 | 160 | 0.06 | 0.08 | 0.14 |
| 519.15  | 5017.351 | 1200 | 180 | 0.06 | 0.07 | 0.11 |
| 518.74  | 5017.423 | 1200 | 200 | 0.06 | 0.07 | 0.12 |

|         |          |      |     |      |      |      |
|---------|----------|------|-----|------|------|------|
| 518.379 | 5017.631 | 1200 | 220 | 0.08 | 0.07 | 0.17 |
| 518.111 | 5017.951 | 1200 | 240 | 0.11 | 0.10 | 0.21 |
| 517.968 | 5018.342 | 1200 | 260 | 0.15 | 0.16 | 0.23 |
| 517.968 | 5018.759 | 1200 | 280 | 0.14 | 0.17 | 0.20 |
| 518.111 | 5019.15  | 1200 | 300 | 0.10 | 0.09 | 0.11 |
| 518.379 | 5019.47  | 1200 | 320 | 0.09 | 0.06 | 0.07 |
| 518.74  | 5019.678 | 1200 | 340 | 0.07 | 0.06 | 0.06 |
| 519.15  | 5019.951 | 1400 | 0   | 0.05 | 0.04 | 0.05 |
| 519.629 | 5019.866 | 1400 | 20  | 0.06 | 0.04 | 0.05 |
| 520.05  | 5019.623 | 1400 | 40  | 0.06 | 0.06 | 0.09 |
| 520.362 | 5019.25  | 1400 | 60  | 0.10 | 0.10 | 0.18 |
| 520.529 | 5018.793 | 1400 | 80  | 0.13 | 0.12 | 0.20 |
| 520.529 | 5018.308 | 1400 | 100 | 0.09 | 0.10 | 0.17 |
| 520.362 | 5017.851 | 1400 | 120 | 0.06 | 0.08 | 0.14 |
| 520.05  | 5017.478 | 1400 | 140 | 0.06 | 0.07 | 0.11 |
| 519.629 | 5017.235 | 1400 | 160 | 0.05 | 0.06 | 0.11 |
| 519.15  | 5017.15  | 1400 | 180 | 0.05 | 0.06 | 0.09 |
| 518.671 | 5017.235 | 1400 | 200 | 0.05 | 0.05 | 0.10 |
| 518.25  | 5017.478 | 1400 | 220 | 0.06 | 0.06 | 0.15 |
| 517.938 | 5017.851 | 1400 | 240 | 0.09 | 0.08 | 0.18 |
| 517.771 | 5018.308 | 1400 | 260 | 0.12 | 0.13 | 0.19 |
| 517.771 | 5018.793 | 1400 | 280 | 0.11 | 0.14 | 0.16 |
| 517.938 | 5019.25  | 1400 | 300 | 0.08 | 0.07 | 0.09 |
| 518.25  | 5019.623 | 1400 | 320 | 0.07 | 0.05 | 0.06 |
| 518.671 | 5019.866 | 1400 | 340 | 0.06 | 0.05 | 0.05 |
| 519.15  | 5020.15  | 1600 | 0   | 0.04 | 0.04 | 0.04 |
| 519.697 | 5020.054 | 1600 | 20  | 0.05 | 0.04 | 0.04 |
| 520.178 | 5019.776 | 1600 | 40  | 0.05 | 0.05 | 0.07 |
| 520.536 | 5019.351 | 1600 | 60  | 0.08 | 0.08 | 0.15 |
| 520.726 | 5018.828 | 1600 | 80  | 0.11 | 0.10 | 0.18 |
| 520.726 | 5018.272 | 1600 | 100 | 0.08 | 0.08 | 0.15 |
| 520.536 | 5017.75  | 1600 | 120 | 0.06 | 0.07 | 0.12 |
| 520.178 | 5017.325 | 1600 | 140 | 0.05 | 0.06 | 0.10 |
| 519.697 | 5017.047 | 1600 | 160 | 0.04 | 0.05 | 0.10 |
| 519.15  | 5016.951 | 1600 | 180 | 0.04 | 0.05 | 0.08 |
| 518.603 | 5017.047 | 1600 | 200 | 0.04 | 0.04 | 0.08 |
| 518.122 | 5017.325 | 1600 | 220 | 0.05 | 0.05 | 0.12 |
| 517.764 | 5017.75  | 1600 | 240 | 0.08 | 0.07 | 0.16 |
| 517.574 | 5018.272 | 1600 | 260 | 0.11 | 0.11 | 0.17 |
| 517.574 | 5018.828 | 1600 | 280 | 0.09 | 0.12 | 0.14 |
| 517.764 | 5019.351 | 1600 | 300 | 0.07 | 0.06 | 0.08 |
| 518.122 | 5019.776 | 1600 | 320 | 0.06 | 0.04 | 0.05 |
| 518.603 | 5020.054 | 1600 | 340 | 0.05 | 0.04 | 0.05 |
| 519.15  | 5020.351 | 1800 | 0   | 0.04 | 0.03 | 0.04 |

|         |          |      |     |      |      |      |
|---------|----------|------|-----|------|------|------|
| 519.766 | 5020.242 | 1800 | 20  | 0.04 | 0.03 | 0.04 |
| 520.307 | 5019.929 | 1800 | 40  | 0.04 | 0.04 | 0.06 |
| 520.709 | 5019.451 | 1800 | 60  | 0.07 | 0.07 | 0.12 |
| 520.923 | 5018.863 | 1800 | 80  | 0.10 | 0.08 | 0.17 |
| 520.923 | 5018.238 | 1800 | 100 | 0.07 | 0.07 | 0.14 |
| 520.709 | 5017.65  | 1800 | 120 | 0.05 | 0.06 | 0.11 |
| 520.307 | 5017.171 | 1800 | 140 | 0.04 | 0.05 | 0.08 |
| 519.766 | 5016.859 | 1800 | 160 | 0.03 | 0.05 | 0.09 |
| 519.15  | 5016.75  | 1800 | 180 | 0.03 | 0.04 | 0.07 |
| 518.534 | 5016.859 | 1800 | 200 | 0.03 | 0.04 | 0.08 |
| 517.993 | 5017.171 | 1800 | 220 | 0.04 | 0.04 | 0.11 |
| 517.591 | 5017.65  | 1800 | 240 | 0.07 | 0.06 | 0.15 |
| 517.377 | 5018.238 | 1800 | 260 | 0.09 | 0.09 | 0.15 |
| 517.377 | 5018.863 | 1800 | 280 | 0.08 | 0.10 | 0.12 |
| 517.591 | 5019.451 | 1800 | 300 | 0.06 | 0.05 | 0.06 |
| 517.993 | 5019.929 | 1800 | 320 | 0.05 | 0.04 | 0.04 |
| 518.534 | 5020.242 | 1800 | 340 | 0.04 | 0.03 | 0.04 |
| 519.15  | 5020.55  | 2000 | 0   | 0.03 | 0.03 | 0.03 |
| 519.834 | 5020.43  | 2000 | 20  | 0.03 | 0.03 | 0.03 |
| 520.436 | 5020.083 | 2000 | 40  | 0.04 | 0.04 | 0.06 |
| 520.882 | 5019.55  | 2000 | 60  | 0.06 | 0.06 | 0.11 |
| 521.12  | 5018.898 | 2000 | 80  | 0.09 | 0.07 | 0.15 |
| 521.12  | 5018.203 | 2000 | 100 | 0.06 | 0.06 | 0.13 |
| 520.882 | 5017.55  | 2000 | 120 | 0.04 | 0.05 | 0.10 |
| 520.436 | 5017.019 | 2000 | 140 | 0.03 | 0.04 | 0.08 |
| 519.834 | 5016.671 | 2000 | 160 | 0.03 | 0.04 | 0.07 |
| 519.15  | 5016.55  | 2000 | 180 | 0.03 | 0.03 | 0.06 |
| 518.466 | 5016.671 | 2000 | 200 | 0.03 | 0.03 | 0.08 |
| 517.864 | 5017.019 | 2000 | 220 | 0.03 | 0.04 | 0.10 |
| 517.418 | 5017.55  | 2000 | 240 | 0.06 | 0.06 | 0.13 |
| 517.18  | 5018.203 | 2000 | 260 | 0.08 | 0.08 | 0.14 |
| 517.18  | 5018.898 | 2000 | 280 | 0.07 | 0.09 | 0.11 |
| 517.418 | 5019.55  | 2000 | 300 | 0.05 | 0.04 | 0.05 |
| 517.864 | 5020.083 | 2000 | 320 | 0.04 | 0.03 | 0.04 |
| 518.466 | 5020.43  | 2000 | 340 | 0.03 | 0.03 | 0.03 |
| 519.15  | 5020.75  | 2200 | 0   | 0.03 | 0.02 | 0.03 |
| 519.902 | 5020.618 | 2200 | 20  | 0.03 | 0.02 | 0.03 |
| 520.564 | 5020.236 | 2200 | 40  | 0.03 | 0.03 | 0.05 |
| 521.055 | 5019.65  | 2200 | 60  | 0.05 | 0.05 | 0.10 |
| 521.317 | 5018.933 | 2200 | 80  | 0.08 | 0.06 | 0.13 |
| 521.317 | 5018.168 | 2200 | 100 | 0.05 | 0.06 | 0.12 |
| 521.055 | 5017.451 | 2200 | 120 | 0.04 | 0.05 | 0.09 |
| 520.564 | 5016.865 | 2200 | 140 | 0.03 | 0.04 | 0.07 |
| 519.902 | 5016.483 | 2200 | 160 | 0.02 | 0.03 | 0.07 |

|         |          |      |     |      |      |      |
|---------|----------|------|-----|------|------|------|
| 519.15  | 5016.351 | 2200 | 180 | 0.02 | 0.03 | 0.05 |
| 518.398 | 5016.483 | 2200 | 200 | 0.03 | 0.03 | 0.08 |
| 517.736 | 5016.865 | 2200 | 220 | 0.03 | 0.03 | 0.09 |
| 517.245 | 5017.451 | 2200 | 240 | 0.05 | 0.05 | 0.12 |
| 516.983 | 5018.168 | 2200 | 260 | 0.07 | 0.08 | 0.13 |
| 516.983 | 5018.933 | 2200 | 280 | 0.06 | 0.08 | 0.10 |
| 517.245 | 5019.65  | 2200 | 300 | 0.04 | 0.04 | 0.05 |
| 517.736 | 5020.236 | 2200 | 320 | 0.04 | 0.03 | 0.03 |
| 518.398 | 5020.618 | 2200 | 340 | 0.03 | 0.02 | 0.03 |
| 519.15  | 5020.951 | 2400 | 0   | 0.02 | 0.02 | 0.02 |
| 519.971 | 5020.806 | 2400 | 20  | 0.03 | 0.02 | 0.02 |
| 520.693 | 5020.389 | 2400 | 40  | 0.03 | 0.03 | 0.04 |
| 521.228 | 5019.75  | 2400 | 60  | 0.05 | 0.05 | 0.09 |
| 521.514 | 5018.967 | 2400 | 80  | 0.07 | 0.06 | 0.12 |
| 521.514 | 5018.134 | 2400 | 100 | 0.05 | 0.05 | 0.10 |
| 521.228 | 5017.351 | 2400 | 120 | 0.03 | 0.04 | 0.09 |
| 520.693 | 5016.712 | 2400 | 140 | 0.02 | 0.03 | 0.07 |
| 519.971 | 5016.295 | 2400 | 160 | 0.02 | 0.03 | 0.06 |
| 519.15  | 5016.15  | 2400 | 180 | 0.02 | 0.02 | 0.05 |
| 518.329 | 5016.295 | 2400 | 200 | 0.02 | 0.03 | 0.07 |
| 517.607 | 5016.712 | 2400 | 220 | 0.02 | 0.03 | 0.08 |
| 517.072 | 5017.351 | 2400 | 240 | 0.05 | 0.05 | 0.12 |
| 516.786 | 5018.134 | 2400 | 260 | 0.07 | 0.07 | 0.12 |
| 516.786 | 5018.967 | 2400 | 280 | 0.06 | 0.07 | 0.09 |
| 517.072 | 5019.75  | 2400 | 300 | 0.04 | 0.03 | 0.05 |
| 517.607 | 5020.389 | 2400 | 320 | 0.03 | 0.02 | 0.03 |
| 518.329 | 5020.806 | 2400 | 340 | 0.02 | 0.02 | 0.03 |
| 519.15  | 5021.15  | 2600 | 0   | 0.02 | 0.02 | 0.02 |
| 520.039 | 5020.994 | 2600 | 20  | 0.02 | 0.02 | 0.02 |
| 520.821 | 5020.542 | 2600 | 40  | 0.02 | 0.02 | 0.04 |
| 521.402 | 5019.851 | 2600 | 60  | 0.04 | 0.04 | 0.08 |
| 521.711 | 5019.002 | 2600 | 80  | 0.06 | 0.05 | 0.11 |
| 521.711 | 5018.099 | 2600 | 100 | 0.04 | 0.04 | 0.09 |
| 521.402 | 5017.25  | 2600 | 120 | 0.03 | 0.04 | 0.08 |
| 520.821 | 5016.559 | 2600 | 140 | 0.02 | 0.03 | 0.06 |
| 520.039 | 5016.107 | 2600 | 160 | 0.02 | 0.03 | 0.05 |
| 519.15  | 5015.951 | 2600 | 180 | 0.02 | 0.02 | 0.04 |
| 518.261 | 5016.107 | 2600 | 200 | 0.02 | 0.02 | 0.06 |
| 517.479 | 5016.559 | 2600 | 220 | 0.02 | 0.03 | 0.08 |
| 516.898 | 5017.25  | 2600 | 240 | 0.04 | 0.04 | 0.11 |
| 516.589 | 5018.099 | 2600 | 260 | 0.06 | 0.06 | 0.11 |
| 516.589 | 5019.002 | 2600 | 280 | 0.05 | 0.06 | 0.08 |
| 516.898 | 5019.851 | 2600 | 300 | 0.03 | 0.03 | 0.04 |
| 517.479 | 5020.542 | 2600 | 320 | 0.03 | 0.02 | 0.03 |

|         |          |      |     |      |      |      |
|---------|----------|------|-----|------|------|------|
| 518.261 | 5020.994 | 2600 | 340 | 0.02 | 0.02 | 0.02 |
| 519.15  | 5021.351 | 2800 | 0   | 0.02 | 0.01 | 0.02 |
| 520.108 | 5021.182 | 2800 | 20  | 0.02 | 0.01 | 0.02 |
| 520.95  | 5020.695 | 2800 | 40  | 0.02 | 0.02 | 0.03 |
| 521.575 | 5019.951 | 2800 | 60  | 0.03 | 0.04 | 0.08 |
| 521.907 | 5019.037 | 2800 | 80  | 0.05 | 0.04 | 0.09 |
| 521.907 | 5018.064 | 2800 | 100 | 0.03 | 0.03 | 0.08 |
| 521.575 | 5017.15  | 2800 | 120 | 0.03 | 0.03 | 0.07 |
| 520.95  | 5016.406 | 2800 | 140 | 0.02 | 0.03 | 0.05 |
| 520.108 | 5015.919 | 2800 | 160 | 0.01 | 0.02 | 0.04 |
| 519.15  | 5015.75  | 2800 | 180 | 0.01 | 0.02 | 0.03 |
| 518.192 | 5015.919 | 2800 | 200 | 0.02 | 0.02 | 0.06 |
| 517.35  | 5016.406 | 2800 | 220 | 0.02 | 0.02 | 0.07 |
| 516.725 | 5017.15  | 2800 | 240 | 0.04 | 0.04 | 0.10 |
| 516.393 | 5018.064 | 2800 | 260 | 0.05 | 0.05 | 0.10 |
| 516.393 | 5019.037 | 2800 | 280 | 0.04 | 0.05 | 0.07 |
| 516.725 | 5019.951 | 2800 | 300 | 0.03 | 0.03 | 0.03 |
| 517.35  | 5020.695 | 2800 | 320 | 0.02 | 0.02 | 0.02 |
| 518.192 | 5021.182 | 2800 | 340 | 0.02 | 0.01 | 0.02 |
| 519.15  | 5021.55  | 3000 | 0   | 0.01 | 0.01 | 0.01 |
| 520.176 | 5021.37  | 3000 | 20  | 0.02 | 0.01 | 0.02 |
| 521.078 | 5020.849 | 3000 | 40  | 0.02 | 0.02 | 0.03 |
| 521.748 | 5020.05  | 3000 | 60  | 0.03 | 0.03 | 0.06 |
| 522.103 | 5019.071 | 3000 | 80  | 0.03 | 0.03 | 0.06 |
| 522.103 | 5015.731 | 3000 | 100 | 0.02 | 0.03 | 0.06 |
| 521.748 | 5017.05  | 3000 | 120 | 0.02 | 0.03 | 0.06 |
| 521.078 | 5016.252 | 3000 | 140 | 0.02 | 0.02 | 0.05 |
| 520.176 | 5015.731 | 3000 | 160 | 0.01 | 0.02 | 0.04 |
| 519.15  | 5015.549 | 3000 | 180 | 0.01 | 0.02 | 0.04 |
| 518.124 | 5015.731 | 3000 | 200 | 0.01 | 0.02 | 0.05 |
| 517.222 | 5016.252 | 3000 | 220 | 0.02 | 0.02 | 0.06 |
| 516.552 | 5017.05  | 3000 | 240 | 0.03 | 0.03 | 0.09 |
| 516.196 | 5018.03  | 3000 | 260 | 0.04 | 0.04 | 0.08 |
| 516.196 | 5019.071 | 3000 | 280 | 0.03 | 0.04 | 0.06 |
| 516.552 | 5020.05  | 3000 | 300 | 0.03 | 0.02 | 0.03 |
| 517.222 | 5020.849 | 3000 | 320 | 0.02 | 0.02 | 0.02 |
| 518.124 | 5021.37  | 3000 | 340 | 0.01 | 0.01 | 0.02 |

Table S1. Odour concentration values - 98th percentile on annual basis for Point source (Italy)

**Point source – Cuba**

| UTM E<br>[km] | UTM N<br>[km] | Distance<br>[m] | Direction<br>[°] | OBS<br>C <sub>98</sub><br>[ou <sub>E</sub> /m <sup>3</sup> ] | HYBRID<br>C <sub>98</sub><br>[ou <sub>E</sub> /m <sup>3</sup> ] | NO-OBS<br>C <sub>98</sub><br>[ou <sub>E</sub> /m <sup>3</sup> ] |
|---------------|---------------|-----------------|------------------|--------------------------------------------------------------|-----------------------------------------------------------------|-----------------------------------------------------------------|
| 516.100       | 2474.150      | 50              | 0                | 7.12                                                         | 7.36                                                            | 7.40                                                            |



|         |          |     |     |      |      |      |
|---------|----------|-----|-----|------|------|------|
| 516.117 | 2474.147 | 50  | 20  | 5.81 | 5.93 | 6.35 |
| 516.132 | 2474.138 | 50  | 40  | 3.65 | 3.62 | 4.22 |
| 516.143 | 2474.125 | 50  | 60  | 3.15 | 3.35 | 2.21 |
| 516.149 | 2474.109 | 50  | 80  | 2.79 | 2.13 | 0.74 |
| 516.149 | 2474.091 | 50  | 100 | 2.28 | 1.37 | 0.31 |
| 516.143 | 2474.075 | 50  | 120 | 3.16 | 1.95 | 0.50 |
| 516.132 | 2474.062 | 50  | 140 | 3.61 | 1.62 | 1.31 |
| 516.117 | 2474.053 | 50  | 160 | 3.96 | 2.31 | 3.60 |
| 516.100 | 2474.050 | 50  | 180 | 6.78 | 6.16 | 5.37 |
| 516.083 | 2474.053 | 50  | 200 | 7.97 | 7.44 | 6.99 |
| 516.068 | 2474.062 | 50  | 220 | 8.52 | 8.15 | 7.99 |
| 516.057 | 2474.075 | 50  | 240 | 8.95 | 8.76 | 8.79 |
| 516.051 | 2474.091 | 50  | 260 | 9.17 | 9.14 | 8.97 |
| 516.051 | 2474.109 | 50  | 280 | 8.28 | 8.24 | 8.24 |
| 516.057 | 2474.125 | 50  | 300 | 7.27 | 7.30 | 7.05 |
| 516.068 | 2474.138 | 50  | 320 | 6.31 | 6.28 | 6.87 |
| 516.083 | 2474.147 | 50  | 340 | 5.76 | 5.90 | 7.35 |
| 516.100 | 2474.200 | 100 | 0   | 3.44 | 3.66 | 4.65 |
| 516.134 | 2474.194 | 100 | 20  | 2.87 | 3.16 | 3.96 |
| 516.164 | 2474.177 | 100 | 40  | 1.83 | 2.18 | 2.32 |
| 516.187 | 2474.150 | 100 | 60  | 1.53 | 1.76 | 1.23 |
| 516.198 | 2474.117 | 100 | 80  | 1.54 | 1.25 | 0.55 |
| 516.198 | 2474.083 | 100 | 100 | 1.29 | 0.88 | 0.25 |
| 516.187 | 2474.050 | 100 | 120 | 1.89 | 1.18 | 0.44 |
| 516.164 | 2474.023 | 100 | 140 | 2.04 | 0.93 | 0.96 |
| 516.134 | 2474.006 | 100 | 160 | 2.13 | 1.28 | 2.04 |
| 516.100 | 2474.000 | 100 | 180 | 4.05 | 3.81 | 3.48 |
| 516.066 | 2474.006 | 100 | 200 | 5.28 | 4.98 | 4.85 |
| 516.036 | 2474.023 | 100 | 220 | 5.47 | 5.60 | 6.08 |
| 516.013 | 2474.050 | 100 | 240 | 6.11 | 6.45 | 7.50 |
| 516.002 | 2474.083 | 100 | 260 | 5.96 | 6.38 | 6.71 |
| 516.002 | 2474.117 | 100 | 280 | 5.02 | 5.17 | 5.61 |
| 516.013 | 2474.150 | 100 | 300 | 4.07 | 4.27 | 4.00 |
| 516.036 | 2474.177 | 100 | 320 | 3.30 | 3.43 | 4.01 |
| 516.066 | 2474.194 | 100 | 340 | 2.97 | 2.96 | 4.35 |
| 516.100 | 2474.250 | 150 | 0   | 1.90 | 2.03 | 2.65 |
| 516.151 | 2474.241 | 150 | 20  | 1.56 | 1.76 | 2.27 |
| 516.196 | 2474.215 | 150 | 40  | 1.04 | 1.34 | 1.34 |
| 516.230 | 2474.175 | 150 | 60  | 0.91 | 1.12 | 0.61 |
| 516.248 | 2474.126 | 150 | 80  | 0.88 | 0.73 | 0.29 |
| 516.248 | 2474.074 | 150 | 100 | 0.71 | 0.56 | 0.15 |
| 516.230 | 2474.025 | 150 | 120 | 1.04 | 0.59 | 0.27 |
| 516.196 | 2473.985 | 150 | 140 | 1.11 | 0.53 | 0.55 |
| 516.151 | 2473.959 | 150 | 160 | 1.17 | 0.69 | 1.17 |

|         |          |     |     |      |      |      |
|---------|----------|-----|-----|------|------|------|
| 516.100 | 2473.950 | 150 | 180 | 2.37 | 2.23 | 2.11 |
| 516.049 | 2473.959 | 150 | 200 | 3.19 | 3.07 | 3.01 |
| 516.004 | 2473.985 | 150 | 220 | 3.42 | 3.57 | 3.96 |
| 515.970 | 2474.025 | 150 | 240 | 3.98 | 4.35 | 5.20 |
| 515.952 | 2474.074 | 150 | 260 | 3.85 | 4.31 | 4.63 |
| 515.952 | 2474.126 | 150 | 280 | 2.93 | 3.19 | 3.43 |
| 515.970 | 2474.175 | 150 | 300 | 2.39 | 2.52 | 2.34 |
| 516.004 | 2474.215 | 150 | 320 | 1.94 | 1.94 | 2.25 |
| 516.049 | 2474.241 | 150 | 340 | 1.62 | 1.64 | 2.50 |
| 516.100 | 2474.300 | 200 | 0   | 1.17 | 1.25 | 1.67 |
| 516.168 | 2474.288 | 200 | 20  | 0.97 | 1.06 | 1.42 |
| 516.229 | 2474.253 | 200 | 40  | 0.63 | 0.87 | 0.83 |
| 516.273 | 2474.200 | 200 | 60  | 0.56 | 0.69 | 0.37 |
| 516.297 | 2474.135 | 200 | 80  | 0.53 | 0.49 | 0.18 |
| 516.297 | 2474.065 | 200 | 100 | 0.42 | 0.31 | 0.08 |
| 516.273 | 2474.000 | 200 | 120 | 0.65 | 0.35 | 0.13 |
| 516.229 | 2473.947 | 200 | 140 | 0.69 | 0.34 | 0.30 |
| 516.168 | 2473.912 | 200 | 160 | 0.75 | 0.41 | 0.71 |
| 516.100 | 2473.900 | 200 | 180 | 1.52 | 1.46 | 1.37 |
| 516.032 | 2473.912 | 200 | 200 | 2.08 | 2.05 | 1.96 |
| 515.971 | 2473.947 | 200 | 220 | 2.23 | 2.47 | 2.70 |
| 515.927 | 2474.000 | 200 | 240 | 2.72 | 3.12 | 3.76 |
| 515.903 | 2474.065 | 200 | 260 | 2.56 | 3.08 | 3.42 |
| 515.903 | 2474.135 | 200 | 280 | 1.90 | 2.23 | 2.29 |
| 515.927 | 2474.200 | 200 | 300 | 1.53 | 1.63 | 1.44 |
| 515.971 | 2474.253 | 200 | 320 | 1.22 | 1.22 | 1.40 |
| 516.032 | 2474.288 | 200 | 340 | 1.00 | 1.01 | 1.52 |
| 516.100 | 2474.500 | 400 | 0   | 0.34 | 0.41 | 0.49 |
| 516.237 | 2474.476 | 400 | 20  | 0.27 | 0.33 | 0.43 |
| 516.357 | 2474.406 | 400 | 40  | 0.18 | 0.28 | 0.22 |
| 516.446 | 2474.300 | 400 | 60  | 0.15 | 0.20 | 0.11 |
| 516.494 | 2474.169 | 400 | 80  | 0.14 | 0.13 | 0.04 |
| 516.494 | 2474.031 | 400 | 100 | 0.13 | 0.10 | 0.03 |
| 516.446 | 2473.900 | 400 | 120 | 0.19 | 0.09 | 0.05 |
| 516.357 | 2473.794 | 400 | 140 | 0.19 | 0.10 | 0.08 |
| 516.237 | 2473.724 | 400 | 160 | 0.22 | 0.15 | 0.19 |
| 516.100 | 2473.700 | 400 | 180 | 0.47 | 0.46 | 0.43 |
| 515.963 | 2473.724 | 400 | 200 | 0.68 | 0.68 | 0.68 |
| 515.843 | 2473.794 | 400 | 220 | 0.78 | 0.89 | 1.04 |
| 515.754 | 2473.900 | 400 | 240 | 1.01 | 1.30 | 1.57 |
| 515.706 | 2474.031 | 400 | 260 | 0.88 | 1.23 | 1.36 |
| 515.706 | 2474.169 | 400 | 280 | 0.61 | 0.77 | 0.79 |
| 515.754 | 2474.300 | 400 | 300 | 0.46 | 0.53 | 0.44 |
| 515.843 | 2474.406 | 400 | 320 | 0.36 | 0.40 | 0.45 |

|         |          |      |     |      |      |      |
|---------|----------|------|-----|------|------|------|
| 515.963 | 2474.476 | 400  | 340 | 0.29 | 0.34 | 0.44 |
| 516.100 | 2474.700 | 600  | 0   | 0.17 | 0.19 | 0.26 |
| 516.305 | 2474.664 | 600  | 20  | 0.13 | 0.16 | 0.21 |
| 516.486 | 2474.560 | 600  | 40  | 0.08 | 0.13 | 0.10 |
| 516.620 | 2474.400 | 600  | 60  | 0.08 | 0.09 | 0.05 |
| 516.691 | 2474.204 | 600  | 80  | 0.07 | 0.05 | 0.02 |
| 516.691 | 2473.996 | 600  | 100 | 0.07 | 0.04 | 0.01 |
| 516.620 | 2473.800 | 600  | 120 | 0.10 | 0.04 | 0.02 |
| 516.486 | 2473.640 | 600  | 140 | 0.10 | 0.05 | 0.04 |
| 516.305 | 2473.536 | 600  | 160 | 0.11 | 0.08 | 0.10 |
| 516.100 | 2473.500 | 600  | 180 | 0.24 | 0.26 | 0.22 |
| 515.895 | 2473.536 | 600  | 200 | 0.35 | 0.33 | 0.36 |
| 515.714 | 2473.640 | 600  | 220 | 0.43 | 0.47 | 0.68 |
| 515.580 | 2473.800 | 600  | 240 | 0.55 | 0.76 | 1.05 |
| 515.509 | 2473.996 | 600  | 260 | 0.51 | 0.70 | 0.93 |
| 515.509 | 2474.204 | 600  | 280 | 0.31 | 0.37 | 0.42 |
| 515.580 | 2474.400 | 600  | 300 | 0.22 | 0.24 | 0.23 |
| 515.714 | 2474.560 | 600  | 320 | 0.17 | 0.19 | 0.24 |
| 515.895 | 2474.664 | 600  | 340 | 0.14 | 0.16 | 0.22 |
| 516.100 | 2474.900 | 800  | 0   | 0.10 | 0.10 | 0.16 |
| 516.374 | 2474.852 | 800  | 20  | 0.08 | 0.10 | 0.14 |
| 516.614 | 2474.713 | 800  | 40  | 0.05 | 0.08 | 0.06 |
| 516.793 | 2474.500 | 800  | 60  | 0.05 | 0.05 | 0.03 |
| 516.888 | 2474.239 | 800  | 80  | 0.04 | 0.03 | 0.01 |
| 516.888 | 2473.961 | 800  | 100 | 0.04 | 0.02 | 0.01 |
| 516.793 | 2473.700 | 800  | 120 | 0.06 | 0.02 | 0.01 |
| 516.614 | 2473.487 | 800  | 140 | 0.06 | 0.04 | 0.02 |
| 516.374 | 2473.348 | 800  | 160 | 0.07 | 0.05 | 0.06 |
| 516.100 | 2473.300 | 800  | 180 | 0.15 | 0.15 | 0.14 |
| 515.826 | 2473.348 | 800  | 200 | 0.22 | 0.20 | 0.23 |
| 515.586 | 2473.487 | 800  | 220 | 0.28 | 0.30 | 0.55 |
| 515.407 | 2473.700 | 800  | 240 | 0.37 | 0.53 | 0.85 |
| 515.312 | 2473.961 | 800  | 260 | 0.35 | 0.46 | 0.76 |
| 515.312 | 2474.239 | 800  | 280 | 0.19 | 0.22 | 0.28 |
| 515.407 | 2474.500 | 800  | 300 | 0.13 | 0.14 | 0.15 |
| 515.586 | 2474.713 | 800  | 320 | 0.10 | 0.11 | 0.15 |
| 515.826 | 2474.852 | 800  | 340 | 0.08 | 0.10 | 0.14 |
| 516.100 | 2475.100 | 1000 | 0   | 0.07 | 0.06 | 0.11 |
| 516.442 | 2475.040 | 1000 | 20  | 0.05 | 0.07 | 0.10 |
| 516.743 | 2474.866 | 1000 | 40  | 0.03 | 0.06 | 0.04 |
| 516.966 | 2474.600 | 1000 | 60  | 0.03 | 0.03 | 0.02 |
| 517.085 | 2474.274 | 1000 | 80  | 0.03 | 0.02 | 0.01 |
| 517.085 | 2473.926 | 1000 | 100 | 0.03 | 0.01 | 0.01 |
| 516.966 | 2473.600 | 1000 | 120 | 0.04 | 0.01 | 0.01 |

|         |          |      |     |      |      |      |
|---------|----------|------|-----|------|------|------|
| 516.743 | 2473.334 | 1000 | 140 | 0.04 | 0.02 | 0.02 |
| 516.442 | 2473.160 | 1000 | 160 | 0.05 | 0.04 | 0.04 |
| 516.100 | 2473.100 | 1000 | 180 | 0.11 | 0.09 | 0.10 |
| 515.758 | 2473.160 | 1000 | 200 | 0.15 | 0.12 | 0.18 |
| 515.457 | 2473.334 | 1000 | 220 | 0.21 | 0.22 | 0.44 |
| 515.234 | 2473.600 | 1000 | 240 | 0.27 | 0.39 | 0.72 |
| 515.115 | 2473.926 | 1000 | 260 | 0.27 | 0.34 | 0.61 |
| 515.115 | 2474.274 | 1000 | 280 | 0.14 | 0.14 | 0.20 |
| 515.234 | 2474.600 | 1000 | 300 | 0.09 | 0.09 | 0.11 |
| 515.457 | 2474.866 | 1000 | 320 | 0.07 | 0.07 | 0.11 |
| 515.758 | 2475.040 | 1000 | 340 | 0.06 | 0.06 | 0.09 |
| 516.100 | 2475.300 | 1200 | 0   | 0.05 | 0.05 | 0.08 |
| 516.510 | 2475.228 | 1200 | 20  | 0.04 | 0.05 | 0.07 |
| 516.871 | 2475.019 | 1200 | 40  | 0.02 | 0.04 | 0.03 |
| 517.139 | 2474.700 | 1200 | 60  | 0.02 | 0.02 | 0.01 |
| 517.282 | 2474.308 | 1200 | 80  | 0.02 | 0.01 | 0.00 |
| 517.282 | 2473.892 | 1200 | 100 | 0.02 | 0.01 | 0.00 |
| 517.139 | 2473.500 | 1200 | 120 | 0.03 | 0.01 | 0.00 |
| 516.871 | 2473.181 | 1200 | 140 | 0.03 | 0.02 | 0.01 |
| 516.510 | 2472.972 | 1200 | 160 | 0.03 | 0.02 | 0.03 |
| 516.100 | 2472.900 | 1200 | 180 | 0.08 | 0.06 | 0.08 |
| 515.690 | 2472.972 | 1200 | 200 | 0.12 | 0.08 | 0.20 |
| 515.329 | 2473.181 | 1200 | 220 | 0.18 | 0.17 | 0.49 |
| 515.061 | 2473.500 | 1200 | 240 | 0.22 | 0.33 | 0.62 |
| 514.918 | 2473.892 | 1200 | 260 | 0.32 | 0.28 | 0.54 |
| 514.918 | 2474.308 | 1200 | 280 | 0.12 | 0.10 | 0.18 |
| 515.061 | 2474.700 | 1200 | 300 | 0.07 | 0.06 | 0.08 |
| 515.329 | 2475.019 | 1200 | 320 | 0.05 | 0.05 | 0.08 |
| 515.690 | 2475.228 | 1200 | 340 | 0.04 | 0.05 | 0.07 |
| 516.100 | 2475.500 | 1400 | 0   | 0.04 | 0.04 | 0.07 |
| 516.579 | 2475.416 | 1400 | 20  | 0.03 | 0.04 | 0.06 |
| 517.000 | 2475.172 | 1400 | 40  | 0.02 | 0.03 | 0.02 |
| 517.312 | 2474.800 | 1400 | 60  | 0.02 | 0.01 | 0.01 |
| 517.479 | 2474.343 | 1400 | 80  | 0.01 | 0.01 | 0.00 |
| 517.479 | 2473.857 | 1400 | 100 | 0.02 | 0.00 | 0.00 |
| 517.312 | 2473.400 | 1400 | 120 | 0.02 | 0.00 | 0.00 |
| 517.000 | 2473.028 | 1400 | 140 | 0.02 | 0.01 | 0.01 |
| 516.579 | 2472.784 | 1400 | 160 | 0.03 | 0.02 | 0.02 |
| 516.100 | 2472.700 | 1400 | 180 | 0.07 | 0.05 | 0.06 |
| 515.621 | 2472.784 | 1400 | 200 | 0.10 | 0.06 | 0.17 |
| 515.200 | 2473.028 | 1400 | 220 | 0.23 | 0.14 | 0.42 |
| 514.888 | 2473.400 | 1400 | 240 | 0.26 | 0.27 | 0.51 |
| 514.721 | 2473.857 | 1400 | 260 | 0.35 | 0.26 | 0.47 |
| 514.721 | 2474.343 | 1400 | 280 | 0.11 | 0.08 | 0.16 |

|         |          |      |     |      |      |      |
|---------|----------|------|-----|------|------|------|
| 514.888 | 2474.800 | 1400 | 300 | 0.05 | 0.05 | 0.07 |
| 515.200 | 2475.172 | 1400 | 320 | 0.04 | 0.04 | 0.06 |
| 515.621 | 2475.416 | 1400 | 340 | 0.03 | 0.04 | 0.06 |
| 516.100 | 2475.700 | 1600 | 0   | 0.03 | 0.03 | 0.05 |
| 516.647 | 2475.604 | 1600 | 20  | 0.02 | 0.03 | 0.05 |
| 517.128 | 2475.326 | 1600 | 40  | 0.02 | 0.02 | 0.02 |
| 517.486 | 2474.900 | 1600 | 60  | 0.01 | 0.01 | 0.01 |
| 517.676 | 2474.378 | 1600 | 80  | 0.01 | 0.00 | 0.00 |
| 517.676 | 2473.822 | 1600 | 100 | 0.01 | 0.00 | 0.00 |
| 517.486 | 2473.300 | 1600 | 120 | 0.02 | 0.00 | 0.00 |
| 517.128 | 2472.874 | 1600 | 140 | 0.02 | 0.01 | 0.01 |
| 516.647 | 2472.596 | 1600 | 160 | 0.02 | 0.01 | 0.01 |
| 516.100 | 2472.500 | 1600 | 180 | 0.05 | 0.04 | 0.05 |
| 515.553 | 2472.596 | 1600 | 200 | 0.08 | 0.05 | 0.15 |
| 515.072 | 2472.874 | 1600 | 220 | 0.22 | 0.13 | 0.36 |
| 514.714 | 2473.300 | 1600 | 240 | 0.28 | 0.29 | 0.44 |
| 514.524 | 2473.822 | 1600 | 260 | 0.34 | 0.25 | 0.40 |
| 514.524 | 2474.378 | 1600 | 280 | 0.11 | 0.06 | 0.13 |
| 514.714 | 2474.900 | 1600 | 300 | 0.04 | 0.04 | 0.06 |
| 515.072 | 2475.326 | 1600 | 320 | 0.03 | 0.03 | 0.05 |
| 515.553 | 2475.604 | 1600 | 340 | 0.03 | 0.03 | 0.05 |
| 516.100 | 2475.900 | 1800 | 0   | 0.02 | 0.03 | 0.05 |
| 516.716 | 2475.791 | 1800 | 20  | 0.02 | 0.02 | 0.04 |
| 517.257 | 2475.479 | 1800 | 40  | 0.01 | 0.02 | 0.02 |
| 517.659 | 2475.000 | 1800 | 60  | 0.01 | 0.01 | 0.00 |
| 517.873 | 2474.413 | 1800 | 80  | 0.01 | 0.00 | 0.00 |
| 517.873 | 2473.787 | 1800 | 100 | 0.01 | 0.00 | 0.00 |
| 517.659 | 2473.200 | 1800 | 120 | 0.02 | 0.00 | 0.00 |
| 517.257 | 2472.721 | 1800 | 140 | 0.01 | 0.01 | 0.00 |
| 516.716 | 2472.409 | 1800 | 160 | 0.02 | 0.01 | 0.01 |
| 516.100 | 2472.300 | 1800 | 180 | 0.04 | 0.03 | 0.05 |
| 515.484 | 2472.409 | 1800 | 200 | 0.07 | 0.04 | 0.13 |
| 514.943 | 2472.721 | 1800 | 220 | 0.20 | 0.11 | 0.30 |
| 514.541 | 2473.200 | 1800 | 240 | 0.28 | 0.27 | 0.37 |
| 514.327 | 2473.787 | 1800 | 260 | 0.31 | 0.22 | 0.35 |
| 514.327 | 2474.413 | 1800 | 280 | 0.10 | 0.05 | 0.11 |
| 514.541 | 2475.000 | 1800 | 300 | 0.04 | 0.03 | 0.05 |
| 514.943 | 2475.479 | 1800 | 320 | 0.03 | 0.03 | 0.04 |
| 515.484 | 2475.791 | 1800 | 340 | 0.02 | 0.03 | 0.04 |
| 516.100 | 2476.100 | 2000 | 0   | 0.02 | 0.02 | 0.04 |
| 516.784 | 2475.979 | 2000 | 20  | 0.01 | 0.02 | 0.04 |
| 517.386 | 2475.632 | 2000 | 40  | 0.01 | 0.01 | 0.01 |
| 517.832 | 2475.100 | 2000 | 60  | 0.01 | 0.01 | 0.00 |
| 518.070 | 2474.447 | 2000 | 80  | 0.01 | 0.00 | 0.00 |

|         |          |      |     |      |      |      |
|---------|----------|------|-----|------|------|------|
| 518.070 | 2473.753 | 2000 | 100 | 0.01 | 0.00 | 0.00 |
| 517.832 | 2473.100 | 2000 | 120 | 0.01 | 0.00 | 0.00 |
| 517.386 | 2472.568 | 2000 | 140 | 0.01 | 0.01 | 0.00 |
| 516.784 | 2472.221 | 2000 | 160 | 0.01 | 0.01 | 0.01 |
| 516.100 | 2472.100 | 2000 | 180 | 0.04 | 0.02 | 0.04 |
| 515.416 | 2472.221 | 2000 | 200 | 0.06 | 0.03 | 0.11 |
| 514.814 | 2472.568 | 2000 | 220 | 0.17 | 0.10 | 0.26 |
| 514.368 | 2473.100 | 2000 | 240 | 0.28 | 0.24 | 0.33 |
| 514.130 | 2473.753 | 2000 | 260 | 0.26 | 0.20 | 0.31 |
| 514.130 | 2474.447 | 2000 | 280 | 0.10 | 0.05 | 0.11 |
| 514.368 | 2475.100 | 2000 | 300 | 0.03 | 0.03 | 0.04 |
| 514.814 | 2475.632 | 2000 | 320 | 0.02 | 0.02 | 0.03 |
| 515.416 | 2475.979 | 2000 | 340 | 0.02 | 0.02 | 0.03 |
| 516.100 | 2476.300 | 2200 | 0   | 0.02 | 0.02 | 0.03 |
| 516.852 | 2476.167 | 2200 | 20  | 0.01 | 0.02 | 0.03 |
| 517.514 | 2475.785 | 2200 | 40  | 0.01 | 0.01 | 0.01 |
| 518.005 | 2475.200 | 2200 | 60  | 0.01 | 0.01 | 0.00 |
| 518.267 | 2474.482 | 2200 | 80  | 0.01 | 0.00 | 0.00 |
| 518.267 | 2473.718 | 2200 | 100 | 0.01 | 0.00 | 0.00 |
| 518.005 | 2473.000 | 2200 | 120 | 0.01 | 0.00 | 0.00 |
| 517.514 | 2472.415 | 2200 | 140 | 0.01 | 0.00 | 0.00 |
| 516.852 | 2472.033 | 2200 | 160 | 0.01 | 0.01 | 0.01 |
| 516.100 | 2471.900 | 2200 | 180 | 0.03 | 0.02 | 0.03 |
| 515.348 | 2472.033 | 2200 | 200 | 0.06 | 0.03 | 0.09 |
| 514.686 | 2472.415 | 2200 | 220 | 0.16 | 0.10 | 0.23 |
| 514.195 | 2473.000 | 2200 | 240 | 0.25 | 0.22 | 0.29 |
| 513.933 | 2473.718 | 2200 | 260 | 0.24 | 0.18 | 0.29 |
| 513.933 | 2474.482 | 2200 | 280 | 0.09 | 0.04 | 0.09 |
| 514.195 | 2475.200 | 2200 | 300 | 0.03 | 0.02 | 0.04 |
| 514.686 | 2475.785 | 2200 | 320 | 0.02 | 0.02 | 0.03 |
| 515.348 | 2476.167 | 2200 | 340 | 0.02 | 0.02 | 0.03 |
| 516.100 | 2476.500 | 2400 | 0   | 0.01 | 0.02 | 0.03 |
| 516.921 | 2476.355 | 2400 | 20  | 0.01 | 0.01 | 0.03 |
| 517.643 | 2475.939 | 2400 | 40  | 0.01 | 0.01 | 0.01 |
| 518.178 | 2475.300 | 2400 | 60  | 0.01 | 0.00 | 0.00 |
| 518.464 | 2474.517 | 2400 | 80  | 0.01 | 0.00 | 0.00 |
| 518.464 | 2473.683 | 2400 | 100 | 0.01 | 0.00 | 0.00 |
| 518.178 | 2472.900 | 2400 | 120 | 0.01 | 0.00 | 0.00 |
| 517.643 | 2472.261 | 2400 | 140 | 0.01 | 0.00 | 0.00 |
| 516.921 | 2471.845 | 2400 | 160 | 0.01 | 0.01 | 0.01 |
| 516.100 | 2471.700 | 2400 | 180 | 0.03 | 0.02 | 0.03 |
| 515.279 | 2471.845 | 2400 | 200 | 0.05 | 0.02 | 0.08 |
| 514.557 | 2472.261 | 2400 | 220 | 0.14 | 0.09 | 0.20 |
| 514.022 | 2472.900 | 2400 | 240 | 0.23 | 0.20 | 0.27 |

|         |          |      |     |      |      |      |
|---------|----------|------|-----|------|------|------|
| 513.736 | 2473.683 | 2400 | 260 | 0.21 | 0.17 | 0.26 |
| 513.736 | 2474.517 | 2400 | 280 | 0.09 | 0.04 | 0.08 |
| 514.022 | 2475.300 | 2400 | 300 | 0.02 | 0.02 | 0.03 |
| 514.557 | 2475.939 | 2400 | 320 | 0.02 | 0.02 | 0.03 |
| 515.279 | 2476.355 | 2400 | 340 | 0.01 | 0.02 | 0.03 |
| 516.100 | 2476.700 | 2600 | 0   | 0.01 | 0.01 | 0.02 |
| 516.989 | 2476.543 | 2600 | 20  | 0.01 | 0.01 | 0.02 |
| 517.771 | 2476.092 | 2600 | 40  | 0.01 | 0.01 | 0.01 |
| 518.352 | 2475.400 | 2600 | 60  | 0.01 | 0.00 | 0.00 |
| 518.661 | 2474.551 | 2600 | 80  | 0.00 | 0.00 | 0.00 |
| 518.661 | 2473.649 | 2600 | 100 | 0.01 | 0.00 | 0.00 |
| 518.352 | 2472.800 | 2600 | 120 | 0.01 | 0.00 | 0.00 |
| 517.771 | 2472.108 | 2600 | 140 | 0.01 | 0.00 | 0.00 |
| 516.989 | 2471.657 | 2600 | 160 | 0.01 | 0.01 | 0.01 |
| 516.100 | 2471.500 | 2600 | 180 | 0.02 | 0.01 | 0.02 |
| 515.211 | 2471.657 | 2600 | 200 | 0.05 | 0.02 | 0.07 |
| 514.429 | 2472.108 | 2600 | 220 | 0.13 | 0.08 | 0.18 |
| 513.848 | 2472.800 | 2600 | 240 | 0.21 | 0.18 | 0.24 |
| 513.539 | 2473.649 | 2600 | 260 | 0.19 | 0.16 | 0.24 |
| 513.539 | 2474.551 | 2600 | 280 | 0.08 | 0.03 | 0.08 |
| 513.848 | 2475.400 | 2600 | 300 | 0.02 | 0.02 | 0.03 |
| 514.429 | 2476.092 | 2600 | 320 | 0.02 | 0.02 | 0.02 |
| 515.211 | 2476.543 | 2600 | 340 | 0.01 | 0.01 | 0.02 |
| 516.100 | 2476.900 | 2800 | 0   | 0.01 | 0.01 | 0.02 |
| 517.058 | 2476.731 | 2800 | 20  | 0.01 | 0.01 | 0.02 |
| 517.900 | 2476.245 | 2800 | 40  | 0.01 | 0.01 | 0.01 |
| 518.525 | 2475.500 | 2800 | 60  | 0.00 | 0.00 | 0.00 |
| 518.857 | 2474.586 | 2800 | 80  | 0.00 | 0.00 | 0.00 |
| 518.857 | 2473.614 | 2800 | 100 | 0.00 | 0.00 | 0.00 |
| 518.525 | 2472.700 | 2800 | 120 | 0.01 | 0.00 | 0.00 |
| 517.900 | 2471.955 | 2800 | 140 | 0.01 | 0.00 | 0.00 |
| 517.058 | 2471.469 | 2800 | 160 | 0.01 | 0.00 | 0.00 |
| 516.100 | 2471.300 | 2800 | 180 | 0.02 | 0.01 | 0.02 |
| 515.142 | 2471.469 | 2800 | 200 | 0.04 | 0.02 | 0.06 |
| 514.300 | 2471.955 | 2800 | 220 | 0.12 | 0.07 | 0.16 |
| 513.675 | 2472.700 | 2800 | 240 | 0.19 | 0.17 | 0.23 |
| 513.343 | 2473.614 | 2800 | 260 | 0.16 | 0.14 | 0.21 |
| 513.343 | 2474.586 | 2800 | 280 | 0.07 | 0.03 | 0.06 |
| 513.675 | 2475.500 | 2800 | 300 | 0.02 | 0.01 | 0.02 |
| 514.300 | 2476.245 | 2800 | 320 | 0.01 | 0.01 | 0.02 |
| 515.142 | 2476.731 | 2800 | 340 | 0.01 | 0.01 | 0.02 |
| 516.100 | 2477.100 | 3000 | 0   | 0.01 | 0.01 | 0.01 |
| 517.126 | 2476.919 | 3000 | 20  | 0.01 | 0.01 | 0.01 |
| 518.028 | 2476.398 | 3000 | 40  | 0.00 | 0.01 | 0.01 |

|         |          |      |     |      |      |      |
|---------|----------|------|-----|------|------|------|
| 518.698 | 2475.600 | 3000 | 60  | 0.00 | 0.00 | 0.00 |
| 519.054 | 2474.621 | 3000 | 80  | 0.00 | 0.00 | 0.00 |
| 519.054 | 2473.579 | 3000 | 100 | 0.00 | 0.00 | 0.00 |
| 518.698 | 2472.600 | 3000 | 120 | 0.01 | 0.00 | 0.00 |
| 518.028 | 2471.802 | 3000 | 140 | 0.00 | 0.00 | 0.00 |
| 517.126 | 2471.281 | 3000 | 160 | 0.01 | 0.00 | 0.00 |
| 516.100 | 2471.100 | 3000 | 180 | 0.01 | 0.01 | 0.01 |
| 515.074 | 2471.281 | 3000 | 200 | 0.03 | 0.01 | 0.05 |
| 514.172 | 2471.802 | 3000 | 220 | 0.11 | 0.07 | 0.15 |
| 513.502 | 2472.600 | 3000 | 240 | 0.17 | 0.16 | 0.21 |
| 513.146 | 2473.579 | 3000 | 260 | 0.11 | 0.10 | 0.15 |
| 513.146 | 2474.621 | 3000 | 280 | 0.05 | 0.02 | 0.05 |
| 513.502 | 2475.600 | 3000 | 300 | 0.02 | 0.01 | 0.02 |
| 514.172 | 2476.398 | 3000 | 320 | 0.01 | 0.01 | 0.02 |
| 515.074 | 2476.919 | 3000 | 340 | 0.01 | 0.01 | 0.01 |

**Table S2. Odour concentration values - 98th percentile on annual basis for Point source (Cuba)**

### Area source – Italy

| <b>UTM E<br/>[km]</b> | <b>UTM N<br/>[km]</b> | <b>Distance<br/>[m]</b> | <b>Direction<br/>[°]</b> | <b>OBS<br/>C<sub>98</sub><br/>[ou<sub>E</sub>/m<sup>3</sup>]</b> | <b>HYBRID<br/>C<sub>98</sub><br/>[ou<sub>E</sub>/m<sup>3</sup>]</b> | <b>NO-OBS<br/>C<sub>98</sub><br/>[ou<sub>E</sub>/m<sup>3</sup>]</b> |
|-----------------------|-----------------------|-------------------------|--------------------------|------------------------------------------------------------------|---------------------------------------------------------------------|---------------------------------------------------------------------|
| 519.15                | 5018.601              | 50                      | 0                        | 15.48                                                            | 15.70                                                               | 12.54                                                               |
| 519.167               | 5018.598              | 50                      | 20                       | 15.77                                                            | 15.52                                                               | 13.46                                                               |
| 519.182               | 5018.589              | 50                      | 40                       | 17.70                                                            | 16.60                                                               | 13.33                                                               |
| 519.193               | 5018.576              | 50                      | 60                       | 20.74                                                            | 20.40                                                               | 14.13                                                               |
| 519.199               | 5018.559              | 50                      | 80                       | 20.13                                                            | 19.81                                                               | 14.73                                                               |
| 519.199               | 5018.542              | 50                      | 100                      | 18.39                                                            | 18.36                                                               | 14.05                                                               |
| 519.193               | 5018.525              | 50                      | 120                      | 16.42                                                            | 16.78                                                               | 13.55                                                               |
| 519.182               | 5018.512              | 50                      | 140                      | 15.20                                                            | 15.28                                                               | 12.29                                                               |
| 519.167               | 5018.503              | 50                      | 160                      | 14.12                                                            | 14.08                                                               | 11.21                                                               |
| 519.15                | 5018.5                | 50                      | 180                      | 13.17                                                            | 13.13                                                               | 10.29                                                               |
| 519.133               | 5018.503              | 50                      | 200                      | 12.44                                                            | 12.45                                                               | 9.75                                                                |
| 519.118               | 5018.512              | 50                      | 220                      | 12.00                                                            | 12.07                                                               | 9.43                                                                |
| 519.107               | 5018.525              | 50                      | 240                      | 11.61                                                            | 11.80                                                               | 9.44                                                                |
| 519.101               | 5018.542              | 50                      | 260                      | 11.88                                                            | 12.12                                                               | 9.96                                                                |
| 519.101               | 5018.559              | 50                      | 280                      | 12.46                                                            | 13.00                                                               | 10.78                                                               |
| 519.107               | 5018.576              | 50                      | 300                      | 13.19                                                            | 13.96                                                               | 11.18                                                               |
| 519.118               | 5018.589              | 50                      | 320                      | 14.41                                                            | 14.99                                                               | 11.68                                                               |
| 519.133               | 5018.598              | 50                      | 340                      | 15.20                                                            | 15.39                                                               | 12.11                                                               |
| 519.15                | 5018.65               | 100                     | 0                        | 11.21                                                            | 11.54                                                               | 8.83                                                                |
| 519.184               | 5018.645              | 100                     | 20                       | 12.40                                                            | 12.99                                                               | 10.01                                                               |
| 519.214               | 5018.627              | 100                     | 40                       | 13.81                                                            | 14.14                                                               | 10.21                                                               |
| 519.237               | 5018.601              | 100                     | 60                       | 14.21                                                            | 14.61                                                               | 10.80                                                               |
| 519.248               | 5018.568              | 100                     | 80                       | 13.05                                                            | 13.61                                                               | 10.31                                                               |



|         |          |     |     |       |       |      |
|---------|----------|-----|-----|-------|-------|------|
| 519.248 | 5018.533 | 100 | 100 | 11.97 | 12.28 | 9.34 |
| 519.237 | 5018.5   | 100 | 120 | 11.23 | 11.32 | 8.27 |
| 519.214 | 5018.474 | 100 | 140 | 9.94  | 10.14 | 7.66 |
| 519.184 | 5018.457 | 100 | 160 | 9.41  | 9.48  | 7.23 |
| 519.15  | 5018.451 | 100 | 180 | 8.64  | 8.76  | 6.60 |
| 519.116 | 5018.457 | 100 | 200 | 8.17  | 8.23  | 6.20 |
| 519.086 | 5018.474 | 100 | 220 | 7.81  | 7.90  | 6.00 |
| 519.063 | 5018.5   | 100 | 240 | 7.64  | 7.75  | 6.03 |
| 519.052 | 5018.533 | 100 | 260 | 7.84  | 8.09  | 6.66 |
| 519.052 | 5018.568 | 100 | 280 | 8.26  | 8.80  | 6.89 |
| 519.063 | 5018.601 | 100 | 300 | 8.81  | 9.32  | 7.08 |
| 519.086 | 5018.627 | 100 | 320 | 9.08  | 9.68  | 7.00 |
| 519.116 | 5018.645 | 100 | 340 | 9.71  | 10.14 | 7.23 |
| 519.15  | 5018.701 | 150 | 0   | 6.89  | 7.15  | 5.08 |
| 519.201 | 5018.691 | 150 | 20  | 7.82  | 8.17  | 5.90 |
| 519.246 | 5018.666 | 150 | 40  | 8.50  | 8.58  | 5.93 |
| 519.28  | 5018.625 | 150 | 60  | 9.60  | 9.81  | 6.75 |
| 519.298 | 5018.577 | 150 | 80  | 8.91  | 9.23  | 6.63 |
| 519.298 | 5018.524 | 150 | 100 | 7.89  | 7.91  | 5.83 |
| 519.28  | 5018.476 | 150 | 120 | 6.83  | 6.76  | 4.96 |
| 519.246 | 5018.436 | 150 | 140 | 5.64  | 5.90  | 4.48 |
| 519.201 | 5018.41  | 150 | 160 | 5.33  | 5.51  | 4.33 |
| 519.15  | 5018.4   | 150 | 180 | 5.21  | 5.34  | 4.08 |
| 519.099 | 5018.41  | 150 | 200 | 5.00  | 5.15  | 3.96 |
| 519.054 | 5018.436 | 150 | 220 | 4.89  | 5.02  | 3.90 |
| 519.02  | 5018.476 | 150 | 240 | 4.70  | 4.85  | 3.88 |
| 519.002 | 5018.524 | 150 | 260 | 4.72  | 4.93  | 4.06 |
| 519.002 | 5018.577 | 150 | 280 | 5.06  | 5.34  | 4.11 |
| 519.02  | 5018.625 | 150 | 300 | 5.39  | 5.67  | 4.09 |
| 519.054 | 5018.666 | 150 | 320 | 5.66  | 5.97  | 4.13 |
| 519.099 | 5018.691 | 150 | 340 | 6.27  | 6.66  | 4.36 |
| 519.15  | 5018.75  | 200 | 0   | 4.57  | 4.48  | 3.11 |
| 519.218 | 5018.738 | 200 | 20  | 4.72  | 4.80  | 3.45 |
| 519.279 | 5018.704 | 200 | 40  | 4.96  | 4.95  | 3.54 |
| 519.323 | 5018.65  | 200 | 60  | 5.87  | 5.73  | 3.93 |
| 519.347 | 5018.585 | 200 | 80  | 5.65  | 5.67  | 4.03 |
| 519.347 | 5018.516 | 200 | 100 | 4.91  | 4.82  | 3.74 |
| 519.323 | 5018.451 | 200 | 120 | 4.59  | 4.41  | 3.41 |
| 519.279 | 5018.397 | 200 | 140 | 4.11  | 4.09  | 3.24 |
| 519.218 | 5018.362 | 200 | 160 | 4.01  | 4.06  | 3.28 |
| 519.15  | 5018.351 | 200 | 180 | 4.12  | 4.12  | 3.07 |
| 519.082 | 5018.362 | 200 | 200 | 3.96  | 4.01  | 3.03 |
| 519.021 | 5018.397 | 200 | 220 | 3.86  | 3.91  | 3.05 |
| 518.977 | 5018.451 | 200 | 240 | 3.65  | 3.67  | 3.04 |

|         |          |     |     |      |      |      |
|---------|----------|-----|-----|------|------|------|
| 518.953 | 5018.516 | 200 | 260 | 3.44 | 3.54 | 3.04 |
| 518.953 | 5018.585 | 200 | 280 | 3.76 | 3.82 | 3.07 |
| 518.977 | 5018.65  | 200 | 300 | 3.73 | 3.82 | 2.76 |
| 519.021 | 5018.704 | 200 | 320 | 3.88 | 3.83 | 2.67 |
| 519.082 | 5018.738 | 200 | 340 | 4.20 | 4.12 | 2.69 |
| 519.15  | 5018.951 | 400 | 0   | 1.72 | 1.60 | 0.96 |
| 519.287 | 5018.926 | 400 | 20  | 1.74 | 1.70 | 1.13 |
| 519.407 | 5018.857 | 400 | 40  | 1.95 | 1.91 | 1.22 |
| 519.496 | 5018.75  | 400 | 60  | 2.29 | 2.24 | 1.43 |
| 519.544 | 5018.62  | 400 | 80  | 2.17 | 2.20 | 1.45 |
| 519.544 | 5018.481 | 400 | 100 | 2.19 | 2.12 | 1.54 |
| 519.496 | 5018.351 | 400 | 120 | 2.10 | 1.98 | 1.44 |
| 519.407 | 5018.244 | 400 | 140 | 1.89 | 1.86 | 1.32 |
| 519.287 | 5018.175 | 400 | 160 | 1.82 | 1.89 | 1.33 |
| 519.15  | 5018.15  | 400 | 180 | 1.97 | 1.95 | 1.31 |
| 519.013 | 5018.175 | 400 | 200 | 1.95 | 1.96 | 1.35 |
| 518.893 | 5018.244 | 400 | 220 | 1.91 | 1.91 | 1.38 |
| 518.804 | 5018.351 | 400 | 240 | 1.73 | 1.77 | 1.39 |
| 518.756 | 5018.481 | 400 | 260 | 1.64 | 1.72 | 1.36 |
| 518.756 | 5018.62  | 400 | 280 | 1.58 | 1.61 | 1.19 |
| 518.804 | 5018.75  | 400 | 300 | 1.58 | 1.49 | 0.99 |
| 518.893 | 5018.857 | 400 | 320 | 1.64 | 1.46 | 0.95 |
| 519.013 | 5018.926 | 400 | 340 | 1.68 | 1.52 | 0.96 |
| 519.15  | 5019.15  | 600 | 0   | 1.02 | 0.82 | 0.48 |
| 519.355 | 5019.114 | 600 | 20  | 1.07 | 0.95 | 0.58 |
| 519.536 | 5019.01  | 600 | 40  | 1.24 | 1.21 | 0.66 |
| 519.67  | 5018.851 | 600 | 60  | 1.47 | 1.42 | 0.82 |
| 519.741 | 5018.655 | 600 | 80  | 1.40 | 1.44 | 0.85 |
| 519.741 | 5018.446 | 600 | 100 | 1.15 | 1.14 | 0.80 |
| 519.67  | 5018.25  | 600 | 120 | 1.30 | 1.25 | 0.84 |
| 519.536 | 5018.091 | 600 | 140 | 1.16 | 1.11 | 0.74 |
| 519.355 | 5017.987 | 600 | 160 | 1.08 | 1.13 | 0.74 |
| 519.15  | 5017.951 | 600 | 180 | 1.25 | 1.23 | 0.76 |
| 518.945 | 5017.987 | 600 | 200 | 1.21 | 1.21 | 0.80 |
| 518.764 | 5018.091 | 600 | 220 | 1.18 | 1.17 | 0.82 |
| 518.63  | 5018.25  | 600 | 240 | 1.09 | 1.10 | 0.84 |
| 518.559 | 5018.446 | 600 | 260 | 1.02 | 1.04 | 0.81 |
| 518.559 | 5018.655 | 600 | 280 | 0.96 | 0.94 | 0.68 |
| 518.63  | 5018.851 | 600 | 300 | 0.94 | 0.82 | 0.52 |
| 518.764 | 5019.01  | 600 | 320 | 0.95 | 0.74 | 0.48 |
| 518.945 | 5019.114 | 600 | 340 | 0.95 | 0.74 | 0.42 |
| 519.15  | 5019.351 | 800 | 0   | 0.57 | 0.48 | 0.29 |
| 519.424 | 5019.302 | 800 | 20  | 0.67 | 0.64 | 0.36 |
| 519.664 | 5019.163 | 800 | 40  | 0.84 | 0.82 | 0.41 |

|         |          |      |     |      |      |      |
|---------|----------|------|-----|------|------|------|
| 519.843 | 5018.951 | 800  | 60  | 1.04 | 1.00 | 0.54 |
| 519.938 | 5018.689 | 800  | 80  | 1.05 | 1.06 | 0.57 |
| 519.938 | 5018.412 | 800  | 100 | 0.95 | 0.94 | 0.59 |
| 519.843 | 5018.15  | 800  | 120 | 0.81 | 0.80 | 0.53 |
| 519.664 | 5017.938 | 800  | 140 | 0.83 | 0.79 | 0.49 |
| 519.424 | 5017.799 | 800  | 160 | 0.76 | 0.79 | 0.50 |
| 519.15  | 5017.75  | 800  | 180 | 0.90 | 0.87 | 0.51 |
| 518.876 | 5017.799 | 800  | 200 | 0.86 | 0.85 | 0.53 |
| 518.636 | 5017.938 | 800  | 220 | 0.85 | 0.84 | 0.57 |
| 518.457 | 5018.15  | 800  | 240 | 0.77 | 0.77 | 0.57 |
| 518.362 | 5018.412 | 800  | 260 | 0.70 | 0.72 | 0.53 |
| 518.362 | 5018.689 | 800  | 280 | 0.64 | 0.63 | 0.44 |
| 518.457 | 5018.951 | 800  | 300 | 0.57 | 0.53 | 0.31 |
| 518.636 | 5019.163 | 800  | 320 | 0.55 | 0.47 | 0.28 |
| 518.876 | 5019.302 | 800  | 340 | 0.53 | 0.45 | 0.25 |
| 519.15  | 5019.55  | 1000 | 0   | 0.40 | 0.34 | 0.19 |
| 519.492 | 5019.49  | 1000 | 20  | 0.47 | 0.47 | 0.25 |
| 519.793 | 5019.316 | 1000 | 40  | 0.63 | 0.61 | 0.29 |
| 520.016 | 5019.05  | 1000 | 60  | 0.78 | 0.75 | 0.38 |
| 520.135 | 5018.724 | 1000 | 80  | 0.78 | 0.80 | 0.40 |
| 520.135 | 5018.377 | 1000 | 100 | 0.71 | 0.71 | 0.42 |
| 520.016 | 5018.05  | 1000 | 120 | 0.65 | 0.63 | 0.39 |
| 519.793 | 5017.785 | 1000 | 140 | 0.62 | 0.58 | 0.35 |
| 519.492 | 5017.611 | 1000 | 160 | 0.58 | 0.59 | 0.34 |
| 519.15  | 5017.55  | 1000 | 180 | 0.68 | 0.65 | 0.37 |
| 518.808 | 5017.611 | 1000 | 200 | 0.66 | 0.64 | 0.38 |
| 518.507 | 5017.785 | 1000 | 220 | 0.65 | 0.63 | 0.43 |
| 518.284 | 5018.05  | 1000 | 240 | 0.58 | 0.57 | 0.41 |
| 518.165 | 5018.377 | 1000 | 260 | 0.53 | 0.54 | 0.39 |
| 518.165 | 5018.724 | 1000 | 280 | 0.46 | 0.44 | 0.31 |
| 518.284 | 5019.05  | 1000 | 300 | 0.41 | 0.36 | 0.21 |
| 518.507 | 5019.316 | 1000 | 320 | 0.36 | 0.32 | 0.19 |
| 518.808 | 5019.49  | 1000 | 340 | 0.34 | 0.30 | 0.17 |
| 519.15  | 5019.75  | 1200 | 0   | 0.31 | 0.25 | 0.14 |
| 519.56  | 5019.678 | 1200 | 20  | 0.35 | 0.35 | 0.17 |
| 519.921 | 5019.47  | 1200 | 40  | 0.49 | 0.47 | 0.22 |
| 520.189 | 5019.15  | 1200 | 60  | 0.63 | 0.61 | 0.29 |
| 520.332 | 5018.759 | 1200 | 80  | 0.63 | 0.64 | 0.31 |
| 520.332 | 5018.342 | 1200 | 100 | 0.56 | 0.56 | 0.31 |
| 520.189 | 5017.951 | 1200 | 120 | 0.51 | 0.49 | 0.28 |
| 519.921 | 5017.631 | 1200 | 140 | 0.44 | 0.41 | 0.24 |
| 519.56  | 5017.423 | 1200 | 160 | 0.45 | 0.45 | 0.25 |
| 519.15  | 5017.351 | 1200 | 180 | 0.53 | 0.51 | 0.28 |
| 518.74  | 5017.423 | 1200 | 200 | 0.53 | 0.51 | 0.30 |

|         |          |      |     |      |      |      |
|---------|----------|------|-----|------|------|------|
| 518.379 | 5017.631 | 1200 | 220 | 0.52 | 0.50 | 0.33 |
| 518.111 | 5017.951 | 1200 | 240 | 0.47 | 0.45 | 0.32 |
| 517.968 | 5018.342 | 1200 | 260 | 0.42 | 0.41 | 0.29 |
| 517.968 | 5018.759 | 1200 | 280 | 0.36 | 0.35 | 0.23 |
| 518.111 | 5019.15  | 1200 | 300 | 0.32 | 0.27 | 0.16 |
| 518.379 | 5019.47  | 1200 | 320 | 0.27 | 0.23 | 0.14 |
| 518.74  | 5019.678 | 1200 | 340 | 0.26 | 0.23 | 0.12 |
| 519.15  | 5019.951 | 1400 | 0   | 0.25 | 0.19 | 0.10 |
| 519.629 | 5019.866 | 1400 | 20  | 0.29 | 0.27 | 0.14 |
| 520.05  | 5019.623 | 1400 | 40  | 0.39 | 0.37 | 0.17 |
| 520.362 | 5019.25  | 1400 | 60  | 0.52 | 0.49 | 0.22 |
| 520.529 | 5018.793 | 1400 | 80  | 0.52 | 0.53 | 0.23 |
| 520.529 | 5018.308 | 1400 | 100 | 0.46 | 0.46 | 0.24 |
| 520.362 | 5017.851 | 1400 | 120 | 0.41 | 0.39 | 0.21 |
| 520.05  | 5017.478 | 1400 | 140 | 0.37 | 0.34 | 0.20 |
| 519.629 | 5017.235 | 1400 | 160 | 0.36 | 0.35 | 0.19 |
| 519.15  | 5017.15  | 1400 | 180 | 0.41 | 0.39 | 0.21 |
| 518.671 | 5017.235 | 1400 | 200 | 0.43 | 0.41 | 0.23 |
| 518.25  | 5017.478 | 1400 | 220 | 0.41 | 0.39 | 0.26 |
| 517.938 | 5017.851 | 1400 | 240 | 0.38 | 0.37 | 0.25 |
| 517.771 | 5018.308 | 1400 | 260 | 0.34 | 0.33 | 0.23 |
| 517.771 | 5018.793 | 1400 | 280 | 0.28 | 0.27 | 0.18 |
| 517.938 | 5019.25  | 1400 | 300 | 0.26 | 0.21 | 0.12 |
| 518.25  | 5019.623 | 1400 | 320 | 0.21 | 0.17 | 0.10 |
| 518.671 | 5019.866 | 1400 | 340 | 0.20 | 0.18 | 0.09 |
| 519.15  | 5020.15  | 1600 | 0   | 0.20 | 0.16 | 0.08 |
| 519.697 | 5020.054 | 1600 | 20  | 0.23 | 0.21 | 0.11 |
| 520.178 | 5019.776 | 1600 | 40  | 0.32 | 0.30 | 0.13 |
| 520.536 | 5019.351 | 1600 | 60  | 0.43 | 0.41 | 0.18 |
| 520.726 | 5018.828 | 1600 | 80  | 0.44 | 0.44 | 0.18 |
| 520.726 | 5018.272 | 1600 | 100 | 0.38 | 0.38 | 0.19 |
| 520.536 | 5017.75  | 1600 | 120 | 0.33 | 0.31 | 0.17 |
| 520.178 | 5017.325 | 1600 | 140 | 0.29 | 0.26 | 0.15 |
| 519.697 | 5017.047 | 1600 | 160 | 0.29 | 0.27 | 0.14 |
| 519.15  | 5016.951 | 1600 | 180 | 0.35 | 0.31 | 0.17 |
| 518.603 | 5017.047 | 1600 | 200 | 0.34 | 0.32 | 0.18 |
| 518.122 | 5017.325 | 1600 | 220 | 0.34 | 0.32 | 0.20 |
| 517.764 | 5017.75  | 1600 | 240 | 0.31 | 0.30 | 0.21 |
| 517.574 | 5018.272 | 1600 | 260 | 0.28 | 0.26 | 0.18 |
| 517.574 | 5018.828 | 1600 | 280 | 0.23 | 0.21 | 0.15 |
| 517.764 | 5019.351 | 1600 | 300 | 0.21 | 0.16 | 0.09 |
| 518.122 | 5019.776 | 1600 | 320 | 0.17 | 0.14 | 0.08 |
| 518.603 | 5020.054 | 1600 | 340 | 0.17 | 0.13 | 0.07 |
| 519.15  | 5020.351 | 1800 | 0   | 0.16 | 0.13 | 0.07 |

|         |          |      |     |      |      |      |
|---------|----------|------|-----|------|------|------|
| 519.766 | 5020.242 | 1800 | 20  | 0.18 | 0.17 | 0.09 |
| 520.307 | 5019.929 | 1800 | 40  | 0.27 | 0.25 | 0.11 |
| 520.709 | 5019.451 | 1800 | 60  | 0.36 | 0.34 | 0.15 |
| 520.923 | 5018.863 | 1800 | 80  | 0.38 | 0.38 | 0.15 |
| 520.923 | 5018.238 | 1800 | 100 | 0.32 | 0.32 | 0.15 |
| 520.709 | 5017.65  | 1800 | 120 | 0.27 | 0.25 | 0.13 |
| 520.307 | 5017.171 | 1800 | 140 | 0.23 | 0.21 | 0.12 |
| 519.766 | 5016.859 | 1800 | 160 | 0.24 | 0.22 | 0.11 |
| 519.15  | 5016.75  | 1800 | 180 | 0.29 | 0.26 | 0.14 |
| 518.534 | 5016.859 | 1800 | 200 | 0.30 | 0.27 | 0.15 |
| 517.993 | 5017.171 | 1800 | 220 | 0.30 | 0.28 | 0.17 |
| 517.591 | 5017.65  | 1800 | 240 | 0.26 | 0.25 | 0.17 |
| 517.377 | 5018.238 | 1800 | 260 | 0.23 | 0.21 | 0.15 |
| 517.377 | 5018.863 | 1800 | 280 | 0.19 | 0.17 | 0.12 |
| 517.591 | 5019.451 | 1800 | 300 | 0.16 | 0.12 | 0.07 |
| 517.993 | 5019.929 | 1800 | 320 | 0.14 | 0.11 | 0.06 |
| 518.534 | 5020.242 | 1800 | 340 | 0.14 | 0.10 | 0.06 |
| 519.15  | 5020.55  | 2000 | 0   | 0.13 | 0.10 | 0.05 |
| 519.834 | 5020.43  | 2000 | 20  | 0.15 | 0.13 | 0.07 |
| 520.436 | 5020.083 | 2000 | 40  | 0.22 | 0.20 | 0.09 |
| 520.882 | 5019.55  | 2000 | 60  | 0.31 | 0.29 | 0.12 |
| 521.12  | 5018.898 | 2000 | 80  | 0.32 | 0.32 | 0.12 |
| 521.12  | 5018.203 | 2000 | 100 | 0.27 | 0.27 | 0.12 |
| 520.882 | 5017.55  | 2000 | 120 | 0.22 | 0.21 | 0.11 |
| 520.436 | 5017.019 | 2000 | 140 | 0.19 | 0.17 | 0.10 |
| 519.834 | 5016.671 | 2000 | 160 | 0.19 | 0.17 | 0.09 |
| 519.15  | 5016.55  | 2000 | 180 | 0.24 | 0.21 | 0.12 |
| 518.466 | 5016.671 | 2000 | 200 | 0.26 | 0.23 | 0.13 |
| 517.864 | 5017.019 | 2000 | 220 | 0.26 | 0.23 | 0.15 |
| 517.418 | 5017.55  | 2000 | 240 | 0.22 | 0.21 | 0.14 |
| 517.18  | 5018.203 | 2000 | 260 | 0.20 | 0.18 | 0.12 |
| 517.18  | 5018.898 | 2000 | 280 | 0.16 | 0.13 | 0.10 |
| 517.418 | 5019.55  | 2000 | 300 | 0.13 | 0.10 | 0.06 |
| 517.864 | 5020.083 | 2000 | 320 | 0.12 | 0.09 | 0.05 |
| 518.466 | 5020.43  | 2000 | 340 | 0.11 | 0.08 | 0.05 |
| 519.15  | 5020.75  | 2200 | 0   | 0.11 | 0.08 | 0.04 |
| 519.902 | 5020.618 | 2200 | 20  | 0.12 | 0.11 | 0.06 |
| 520.564 | 5020.236 | 2200 | 40  | 0.19 | 0.17 | 0.08 |
| 521.055 | 5019.65  | 2200 | 60  | 0.26 | 0.25 | 0.10 |
| 521.317 | 5018.933 | 2200 | 80  | 0.27 | 0.27 | 0.10 |
| 521.317 | 5018.168 | 2200 | 100 | 0.22 | 0.22 | 0.10 |
| 521.055 | 5017.451 | 2200 | 120 | 0.18 | 0.17 | 0.09 |
| 520.564 | 5016.865 | 2200 | 140 | 0.15 | 0.13 | 0.08 |
| 519.902 | 5016.483 | 2200 | 160 | 0.16 | 0.14 | 0.08 |

|         |          |      |     |      |      |      |
|---------|----------|------|-----|------|------|------|
| 519.15  | 5016.351 | 2200 | 180 | 0.21 | 0.18 | 0.10 |
| 518.398 | 5016.483 | 2200 | 200 | 0.22 | 0.20 | 0.11 |
| 517.736 | 5016.865 | 2200 | 220 | 0.22 | 0.20 | 0.13 |
| 517.245 | 5017.451 | 2200 | 240 | 0.19 | 0.18 | 0.12 |
| 516.983 | 5018.168 | 2200 | 260 | 0.17 | 0.15 | 0.10 |
| 516.983 | 5018.933 | 2200 | 280 | 0.13 | 0.10 | 0.08 |
| 517.245 | 5019.65  | 2200 | 300 | 0.11 | 0.08 | 0.05 |
| 517.736 | 5020.236 | 2200 | 320 | 0.10 | 0.07 | 0.04 |
| 518.398 | 5020.618 | 2200 | 340 | 0.09 | 0.06 | 0.04 |
| 519.15  | 5020.951 | 2400 | 0   | 0.09 | 0.06 | 0.03 |
| 519.971 | 5020.806 | 2400 | 20  | 0.10 | 0.09 | 0.05 |
| 520.693 | 5020.389 | 2400 | 40  | 0.15 | 0.14 | 0.06 |
| 521.228 | 5019.75  | 2400 | 60  | 0.23 | 0.21 | 0.09 |
| 521.514 | 5018.967 | 2400 | 80  | 0.23 | 0.23 | 0.09 |
| 521.514 | 5018.134 | 2400 | 100 | 0.18 | 0.18 | 0.08 |
| 521.228 | 5017.351 | 2400 | 120 | 0.15 | 0.14 | 0.07 |
| 520.693 | 5016.712 | 2400 | 140 | 0.12 | 0.11 | 0.07 |
| 519.971 | 5016.295 | 2400 | 160 | 0.12 | 0.11 | 0.06 |
| 519.15  | 5016.15  | 2400 | 180 | 0.17 | 0.14 | 0.08 |
| 518.329 | 5016.295 | 2400 | 200 | 0.19 | 0.17 | 0.09 |
| 517.607 | 5016.712 | 2400 | 220 | 0.19 | 0.17 | 0.11 |
| 517.072 | 5017.351 | 2400 | 240 | 0.16 | 0.15 | 0.10 |
| 516.786 | 5018.134 | 2400 | 260 | 0.14 | 0.12 | 0.08 |
| 516.786 | 5018.967 | 2400 | 280 | 0.11 | 0.08 | 0.07 |
| 517.072 | 5019.75  | 2400 | 300 | 0.09 | 0.06 | 0.04 |
| 517.607 | 5020.389 | 2400 | 320 | 0.08 | 0.06 | 0.03 |
| 518.329 | 5020.806 | 2400 | 340 | 0.08 | 0.05 | 0.03 |
| 519.15  | 5021.15  | 2600 | 0   | 0.07 | 0.05 | 0.03 |
| 520.039 | 5020.994 | 2600 | 20  | 0.09 | 0.07 | 0.04 |
| 520.821 | 5020.542 | 2600 | 40  | 0.13 | 0.12 | 0.05 |
| 521.402 | 5019.851 | 2600 | 60  | 0.18 | 0.17 | 0.07 |
| 521.711 | 5019.002 | 2600 | 80  | 0.19 | 0.19 | 0.07 |
| 521.711 | 5018.099 | 2600 | 100 | 0.15 | 0.15 | 0.07 |
| 521.402 | 5017.25  | 2600 | 120 | 0.12 | 0.11 | 0.06 |
| 520.821 | 5016.559 | 2600 | 140 | 0.10 | 0.09 | 0.06 |
| 520.039 | 5016.107 | 2600 | 160 | 0.10 | 0.09 | 0.05 |
| 519.15  | 5015.951 | 2600 | 180 | 0.13 | 0.11 | 0.07 |
| 518.261 | 5016.107 | 2600 | 200 | 0.15 | 0.14 | 0.07 |
| 517.479 | 5016.559 | 2600 | 220 | 0.17 | 0.15 | 0.09 |
| 516.898 | 5017.25  | 2600 | 240 | 0.14 | 0.13 | 0.09 |
| 516.589 | 5018.099 | 2600 | 260 | 0.11 | 0.10 | 0.07 |
| 516.589 | 5019.002 | 2600 | 280 | 0.09 | 0.07 | 0.05 |
| 516.898 | 5019.851 | 2600 | 300 | 0.07 | 0.05 | 0.03 |
| 517.479 | 5020.542 | 2600 | 320 | 0.07 | 0.04 | 0.03 |

|         |          |      |     |      |      |      |
|---------|----------|------|-----|------|------|------|
| 518.261 | 5020.994 | 2600 | 340 | 0.06 | 0.04 | 0.02 |
| 519.15  | 5021.351 | 2800 | 0   | 0.06 | 0.04 | 0.02 |
| 520.108 | 5021.182 | 2800 | 20  | 0.07 | 0.06 | 0.03 |
| 520.95  | 5020.695 | 2800 | 40  | 0.11 | 0.09 | 0.05 |
| 521.575 | 5019.951 | 2800 | 60  | 0.15 | 0.14 | 0.06 |
| 521.907 | 5019.037 | 2800 | 80  | 0.14 | 0.14 | 0.06 |
| 521.907 | 5018.064 | 2800 | 100 | 0.12 | 0.11 | 0.05 |
| 521.575 | 5017.15  | 2800 | 120 | 0.10 | 0.09 | 0.05 |
| 520.95  | 5016.406 | 2800 | 140 | 0.08 | 0.07 | 0.05 |
| 520.108 | 5015.919 | 2800 | 160 | 0.08 | 0.07 | 0.04 |
| 519.15  | 5015.75  | 2800 | 180 | 0.11 | 0.09 | 0.05 |
| 518.192 | 5015.919 | 2800 | 200 | 0.12 | 0.11 | 0.06 |
| 517.35  | 5016.406 | 2800 | 220 | 0.14 | 0.13 | 0.08 |
| 516.725 | 5017.15  | 2800 | 240 | 0.12 | 0.11 | 0.07 |
| 516.393 | 5018.064 | 2800 | 260 | 0.09 | 0.08 | 0.05 |
| 516.393 | 5019.037 | 2800 | 280 | 0.07 | 0.05 | 0.04 |
| 516.725 | 5019.951 | 2800 | 300 | 0.06 | 0.04 | 0.03 |
| 517.35  | 5020.695 | 2800 | 320 | 0.06 | 0.04 | 0.02 |
| 518.192 | 5021.182 | 2800 | 340 | 0.05 | 0.03 | 0.02 |
| 519.15  | 5021.55  | 3000 | 0   | 0.05 | 0.03 | 0.02 |
| 520.176 | 5021.37  | 3000 | 20  | 0.06 | 0.05 | 0.02 |
| 521.078 | 5020.849 | 3000 | 40  | 0.09 | 0.08 | 0.04 |
| 521.748 | 5020.05  | 3000 | 60  | 0.12 | 0.11 | 0.05 |
| 522.103 | 5019.071 | 3000 | 80  | 0.11 | 0.10 | 0.05 |
| 522.103 | 5015.731 | 3000 | 100 | 0.09 | 0.08 | 0.04 |
| 521.748 | 5017.05  | 3000 | 120 | 0.08 | 0.07 | 0.04 |
| 521.078 | 5016.252 | 3000 | 140 | 0.07 | 0.06 | 0.04 |
| 520.176 | 5015.731 | 3000 | 160 | 0.07 | 0.06 | 0.03 |
| 519.15  | 5015.549 | 3000 | 180 | 0.09 | 0.07 | 0.04 |
| 518.124 | 5015.731 | 3000 | 200 | 0.10 | 0.08 | 0.05 |
| 517.222 | 5016.252 | 3000 | 220 | 0.12 | 0.11 | 0.07 |
| 516.552 | 5017.05  | 3000 | 240 | 0.10 | 0.09 | 0.06 |
| 516.196 | 5018.03  | 3000 | 260 | 0.07 | 0.06 | 0.04 |
| 516.196 | 5019.071 | 3000 | 280 | 0.06 | 0.04 | 0.03 |
| 516.552 | 5020.05  | 3000 | 300 | 0.05 | 0.03 | 0.02 |
| 517.222 | 5020.849 | 3000 | 320 | 0.05 | 0.03 | 0.02 |
| 518.124 | 5021.37  | 3000 | 340 | 0.05 | 0.03 | 0.01 |

Table S3. Odour concentration values - 98th percentile on annual basis for Area source (Italy)

#### Area source – Cuba

| UTM E<br>[km] | UTM N<br>[km] | Distance<br>[m] | Direction<br>[°] | OBS<br>C <sub>98</sub><br>[ou <sub>E</sub> /m <sup>3</sup> ] | HYBRID<br>C <sub>98</sub><br>[ou <sub>E</sub> /m <sup>3</sup> ] | NO-OBS<br>C <sub>98</sub><br>[ou <sub>E</sub> /m <sup>3</sup> ] |
|---------------|---------------|-----------------|------------------|--------------------------------------------------------------|-----------------------------------------------------------------|-----------------------------------------------------------------|
| 516.100       | 2474.150      | 50              | 0                | 2.54                                                         | 10.07                                                           | 7.62                                                            |

|         |          |     |     |       |       |       |
|---------|----------|-----|-----|-------|-------|-------|
| 516.117 | 2474.147 | 50  | 20  | 3.32  | 10.59 | 8.76  |
| 516.132 | 2474.138 | 50  | 40  | 6.94  | 11.26 | 11.14 |
| 516.143 | 2474.125 | 50  | 60  | 20.10 | 16.91 | 14.49 |
| 516.149 | 2474.109 | 50  | 80  | 22.90 | 19.50 | 15.47 |
| 516.149 | 2474.091 | 50  | 100 | 22.34 | 19.78 | 13.89 |
| 516.143 | 2474.075 | 50  | 120 | 18.27 | 17.21 | 11.39 |
| 516.132 | 2474.062 | 50  | 140 | 14.49 | 14.66 | 9.95  |
| 516.117 | 2474.053 | 50  | 160 | 11.43 | 12.56 | 9.03  |
| 516.100 | 2474.050 | 50  | 180 | 9.80  | 11.00 | 8.45  |
| 516.083 | 2474.053 | 50  | 200 | 8.30  | 10.01 | 7.97  |
| 516.068 | 2474.062 | 50  | 220 | 7.04  | 9.39  | 7.45  |
| 516.057 | 2474.075 | 50  | 240 | 6.70  | 9.00  | 7.14  |
| 516.051 | 2474.091 | 50  | 260 | 6.30  | 8.74  | 7.04  |
| 516.051 | 2474.109 | 50  | 280 | 6.34  | 8.65  | 7.14  |
| 516.057 | 2474.125 | 50  | 300 | 4.93  | 8.78  | 7.05  |
| 516.068 | 2474.138 | 50  | 320 | 3.34  | 9.12  | 6.81  |
| 516.083 | 2474.147 | 50  | 340 | 2.70  | 9.54  | 7.01  |
| 516.100 | 2474.200 | 100 | 0   | 1.58  | 7.09  | 5.37  |
| 516.134 | 2474.194 | 100 | 20  | 1.60  | 7.86  | 5.97  |
| 516.164 | 2474.177 | 100 | 40  | 1.76  | 8.41  | 7.56  |
| 516.187 | 2474.150 | 100 | 60  | 3.23  | 8.53  | 8.42  |
| 516.198 | 2474.117 | 100 | 80  | 12.00 | 10.89 | 9.30  |
| 516.198 | 2474.083 | 100 | 100 | 8.23  | 9.98  | 5.42  |
| 516.187 | 2474.050 | 100 | 120 | 10.36 | 10.30 | 5.10  |
| 516.164 | 2474.023 | 100 | 140 | 10.22 | 10.09 | 5.72  |
| 516.134 | 2474.006 | 100 | 160 | 8.95  | 9.14  | 6.14  |
| 516.100 | 2474.000 | 100 | 180 | 7.38  | 7.82  | 5.68  |
| 516.066 | 2474.006 | 100 | 200 | 6.16  | 6.70  | 5.46  |
| 516.036 | 2474.023 | 100 | 220 | 5.25  | 5.89  | 5.26  |
| 516.013 | 2474.050 | 100 | 240 | 4.89  | 5.35  | 5.04  |
| 516.002 | 2474.083 | 100 | 260 | 4.32  | 5.23  | 4.93  |
| 516.002 | 2474.117 | 100 | 280 | 3.79  | 5.28  | 4.82  |
| 516.013 | 2474.150 | 100 | 300 | 1.68  | 5.45  | 4.31  |
| 516.036 | 2474.177 | 100 | 320 | 1.55  | 5.86  | 4.17  |
| 516.066 | 2474.194 | 100 | 340 | 1.56  | 6.35  | 4.28  |
| 516.100 | 2474.250 | 150 | 0   | 1.51  | 4.88  | 2.89  |
| 516.151 | 2474.241 | 150 | 20  | 1.52  | 5.79  | 3.08  |
| 516.196 | 2474.215 | 150 | 40  | 1.55  | 6.27  | 3.85  |
| 516.230 | 2474.175 | 150 | 60  | 1.57  | 6.17  | 2.11  |
| 516.248 | 2474.126 | 150 | 80  | 1.60  | 6.15  | 1.69  |
| 516.248 | 2474.074 | 150 | 100 | 1.62  | 6.14  | 1.57  |
| 516.230 | 2474.025 | 150 | 120 | 2.71  | 6.27  | 1.62  |
| 516.196 | 2473.985 | 150 | 140 | 5.29  | 6.11  | 2.07  |
| 516.151 | 2473.959 | 150 | 160 | 6.04  | 5.68  | 3.24  |



|         |          |     |     |      |      |      |
|---------|----------|-----|-----|------|------|------|
| 516.100 | 2473.950 | 150 | 180 | 5.51 | 5.53 | 3.95 |
| 516.049 | 2473.959 | 150 | 200 | 4.64 | 5.06 | 3.97 |
| 516.004 | 2473.985 | 150 | 220 | 4.00 | 4.40 | 4.01 |
| 515.970 | 2474.025 | 150 | 240 | 3.73 | 3.74 | 3.86 |
| 515.952 | 2474.074 | 150 | 260 | 3.32 | 3.56 | 3.74 |
| 515.952 | 2474.126 | 150 | 280 | 2.40 | 3.35 | 3.56 |
| 515.970 | 2474.175 | 150 | 300 | 1.49 | 3.40 | 2.98 |
| 516.004 | 2474.215 | 150 | 320 | 1.47 | 3.69 | 2.70 |
| 516.049 | 2474.241 | 150 | 340 | 1.49 | 4.11 | 2.73 |
| 516.100 | 2474.300 | 200 | 0   | 1.46 | 3.33 | 1.55 |
| 516.168 | 2474.288 | 200 | 20  | 1.47 | 3.91 | 2.00 |
| 516.229 | 2474.253 | 200 | 40  | 1.53 | 4.20 | 1.77 |
| 516.273 | 2474.200 | 200 | 60  | 1.54 | 4.18 | 0.83 |
| 516.297 | 2474.135 | 200 | 80  | 1.56 | 3.93 | 0.65 |
| 516.297 | 2474.065 | 200 | 100 | 1.59 | 3.83 | 0.62 |
| 516.273 | 2474.000 | 200 | 120 | 1.60 | 3.88 | 0.72 |
| 516.229 | 2473.947 | 200 | 140 | 2.61 | 3.79 | 0.94 |
| 516.168 | 2473.912 | 200 | 160 | 4.11 | 3.65 | 1.76 |
| 516.100 | 2473.900 | 200 | 180 | 4.15 | 3.99 | 2.73 |
| 516.032 | 2473.912 | 200 | 200 | 3.65 | 3.96 | 3.03 |
| 515.971 | 2473.947 | 200 | 220 | 3.23 | 3.52 | 3.14 |
| 515.927 | 2474.000 | 200 | 240 | 2.89 | 2.99 | 3.11 |
| 515.903 | 2474.065 | 200 | 260 | 2.50 | 2.70 | 2.99 |
| 515.903 | 2474.135 | 200 | 280 | 1.54 | 2.29 | 2.70 |
| 515.927 | 2474.200 | 200 | 300 | 1.39 | 2.27 | 2.13 |
| 515.971 | 2474.253 | 200 | 320 | 1.36 | 2.44 | 1.86 |
| 516.032 | 2474.288 | 200 | 340 | 1.40 | 2.75 | 1.84 |
| 516.100 | 2474.500 | 400 | 0   | 1.02 | 1.01 | 0.45 |
| 516.237 | 2474.476 | 400 | 20  | 1.08 | 1.07 | 0.59 |
| 516.357 | 2474.406 | 400 | 40  | 1.13 | 1.10 | 0.27 |
| 516.446 | 2474.300 | 400 | 60  | 1.13 | 1.03 | 0.12 |
| 516.494 | 2474.169 | 400 | 80  | 1.17 | 0.99 | 0.10 |
| 516.494 | 2474.031 | 400 | 100 | 1.21 | 0.99 | 0.10 |
| 516.446 | 2473.900 | 400 | 120 | 1.21 | 1.02 | 0.12 |
| 516.357 | 2473.794 | 400 | 140 | 1.21 | 1.07 | 0.19 |
| 516.237 | 2473.724 | 400 | 160 | 1.26 | 1.13 | 0.34 |
| 516.100 | 2473.700 | 400 | 180 | 1.93 | 1.57 | 0.89 |
| 515.963 | 2473.724 | 400 | 200 | 1.96 | 2.05 | 1.43 |
| 515.843 | 2473.794 | 400 | 220 | 1.69 | 1.93 | 1.62 |
| 515.754 | 2473.900 | 400 | 240 | 1.53 | 1.59 | 1.62 |
| 515.706 | 2474.031 | 400 | 260 | 1.30 | 1.36 | 1.56 |
| 515.706 | 2474.169 | 400 | 280 | 0.95 | 1.00 | 1.30 |
| 515.754 | 2474.300 | 400 | 300 | 0.92 | 0.93 | 0.90 |
| 515.843 | 2474.406 | 400 | 320 | 0.91 | 0.91 | 0.63 |

|         |          |      |     |      |      |      |
|---------|----------|------|-----|------|------|------|
| 515.963 | 2474.476 | 400  | 340 | 0.97 | 0.93 | 0.61 |
| 516.100 | 2474.700 | 600  | 0   | 0.57 | 0.52 | 0.21 |
| 516.305 | 2474.664 | 600  | 20  | 0.62 | 0.51 | 0.24 |
| 516.486 | 2474.560 | 600  | 40  | 0.66 | 0.49 | 0.10 |
| 516.620 | 2474.400 | 600  | 60  | 0.67 | 0.47 | 0.05 |
| 516.691 | 2474.204 | 600  | 80  | 0.69 | 0.44 | 0.04 |
| 516.691 | 2473.996 | 600  | 100 | 0.73 | 0.43 | 0.04 |
| 516.620 | 2473.800 | 600  | 120 | 0.76 | 0.46 | 0.05 |
| 516.486 | 2473.640 | 600  | 140 | 0.78 | 0.51 | 0.07 |
| 516.305 | 2473.536 | 600  | 160 | 0.81 | 0.57 | 0.15 |
| 516.100 | 2473.500 | 600  | 180 | 1.16 | 0.82 | 0.47 |
| 515.895 | 2473.536 | 600  | 200 | 1.27 | 1.33 | 0.87 |
| 515.714 | 2473.640 | 600  | 220 | 1.15 | 1.31 | 1.06 |
| 515.580 | 2473.800 | 600  | 240 | 1.02 | 1.06 | 1.08 |
| 515.509 | 2473.996 | 600  | 260 | 0.84 | 0.89 | 1.03 |
| 515.509 | 2474.204 | 600  | 280 | 0.54 | 0.57 | 0.79 |
| 515.580 | 2474.400 | 600  | 300 | 0.49 | 0.51 | 0.48 |
| 515.714 | 2474.560 | 600  | 320 | 0.50 | 0.50 | 0.35 |
| 515.895 | 2474.664 | 600  | 340 | 0.53 | 0.51 | 0.29 |
| 516.100 | 2474.900 | 800  | 0   | 0.27 | 0.31 | 0.14 |
| 516.374 | 2474.852 | 800  | 20  | 0.30 | 0.29 | 0.13 |
| 516.614 | 2474.713 | 800  | 40  | 0.32 | 0.28 | 0.06 |
| 516.793 | 2474.500 | 800  | 60  | 0.34 | 0.26 | 0.03 |
| 516.888 | 2474.239 | 800  | 80  | 0.35 | 0.24 | 0.02 |
| 516.888 | 2473.961 | 800  | 100 | 0.38 | 0.23 | 0.02 |
| 516.793 | 2473.700 | 800  | 120 | 0.40 | 0.26 | 0.03 |
| 516.614 | 2473.487 | 800  | 140 | 0.43 | 0.30 | 0.04 |
| 516.374 | 2473.348 | 800  | 160 | 0.48 | 0.35 | 0.08 |
| 516.100 | 2473.300 | 800  | 180 | 0.78 | 0.52 | 0.29 |
| 515.826 | 2473.348 | 800  | 200 | 0.97 | 1.01 | 0.68 |
| 515.586 | 2473.487 | 800  | 220 | 0.94 | 1.02 | 0.84 |
| 515.407 | 2473.700 | 800  | 240 | 0.77 | 0.81 | 0.81 |
| 515.312 | 2473.961 | 800  | 260 | 0.65 | 0.70 | 0.83 |
| 515.312 | 2474.239 | 800  | 280 | 0.27 | 0.39 | 0.61 |
| 515.407 | 2474.500 | 800  | 300 | 0.23 | 0.33 | 0.31 |
| 515.586 | 2474.713 | 800  | 320 | 0.23 | 0.31 | 0.23 |
| 515.826 | 2474.852 | 800  | 340 | 0.25 | 0.31 | 0.16 |
| 516.100 | 2475.100 | 1000 | 0   | 0.13 | 0.20 | 0.09 |
| 516.442 | 2475.040 | 1000 | 20  | 0.14 | 0.19 | 0.09 |
| 516.743 | 2474.866 | 1000 | 40  | 0.15 | 0.18 | 0.04 |
| 516.966 | 2474.600 | 1000 | 60  | 0.15 | 0.17 | 0.02 |
| 517.085 | 2474.274 | 1000 | 80  | 0.16 | 0.15 | 0.01 |
| 517.085 | 2473.926 | 1000 | 100 | 0.17 | 0.15 | 0.01 |
| 516.966 | 2473.600 | 1000 | 120 | 0.19 | 0.17 | 0.02 |

|         |          |      |     |      |      |      |
|---------|----------|------|-----|------|------|------|
| 516.743 | 2473.334 | 1000 | 140 | 0.24 | 0.19 | 0.03 |
| 516.442 | 2473.160 | 1000 | 160 | 0.30 | 0.23 | 0.05 |
| 516.100 | 2473.100 | 1000 | 180 | 0.55 | 0.35 | 0.18 |
| 515.758 | 2473.160 | 1000 | 200 | 0.68 | 0.65 | 0.38 |
| 515.457 | 2473.334 | 1000 | 220 | 0.68 | 0.75 | 0.68 |
| 515.234 | 2473.600 | 1000 | 240 | 0.65 | 0.69 | 0.71 |
| 515.115 | 2473.926 | 1000 | 260 | 0.46 | 0.52 | 0.60 |
| 515.115 | 2474.274 | 1000 | 280 | 0.15 | 0.28 | 0.38 |
| 515.234 | 2474.600 | 1000 | 300 | 0.11 | 0.23 | 0.22 |
| 515.457 | 2474.866 | 1000 | 320 | 0.11 | 0.20 | 0.16 |
| 515.758 | 2475.040 | 1000 | 340 | 0.12 | 0.20 | 0.10 |
| 516.100 | 2475.300 | 1200 | 0   | 0.07 | 0.14 | 0.07 |
| 516.510 | 2475.228 | 1200 | 20  | 0.07 | 0.13 | 0.06 |
| 516.871 | 2475.019 | 1200 | 40  | 0.08 | 0.12 | 0.03 |
| 517.139 | 2474.700 | 1200 | 60  | 0.08 | 0.11 | 0.01 |
| 517.282 | 2474.308 | 1200 | 80  | 0.08 | 0.10 | 0.01 |
| 517.282 | 2473.892 | 1200 | 100 | 0.08 | 0.10 | 0.01 |
| 517.139 | 2473.500 | 1200 | 120 | 0.10 | 0.12 | 0.01 |
| 516.871 | 2473.181 | 1200 | 140 | 0.14 | 0.13 | 0.02 |
| 516.510 | 2472.972 | 1200 | 160 | 0.20 | 0.16 | 0.04 |
| 516.100 | 2472.900 | 1200 | 180 | 0.38 | 0.24 | 0.12 |
| 515.690 | 2472.972 | 1200 | 200 | 0.47 | 0.44 | 0.21 |
| 515.329 | 2473.181 | 1200 | 220 | 0.46 | 0.52 | 0.36 |
| 515.061 | 2473.500 | 1200 | 240 | 0.47 | 0.48 | 0.53 |
| 514.918 | 2473.892 | 1200 | 260 | 0.27 | 0.27 | 0.33 |
| 514.918 | 2474.308 | 1200 | 280 | 0.08 | 0.20 | 0.22 |
| 515.061 | 2474.700 | 1200 | 300 | 0.05 | 0.17 | 0.14 |
| 515.329 | 2475.019 | 1200 | 320 | 0.05 | 0.15 | 0.13 |
| 515.690 | 2475.228 | 1200 | 340 | 0.07 | 0.14 | 0.08 |
| 516.100 | 2475.500 | 1400 | 0   | 0.05 | 0.10 | 0.05 |
| 516.579 | 2475.416 | 1400 | 20  | 0.05 | 0.09 | 0.05 |
| 517.000 | 2475.172 | 1400 | 40  | 0.05 | 0.08 | 0.02 |
| 517.312 | 2474.800 | 1400 | 60  | 0.05 | 0.08 | 0.01 |
| 517.479 | 2474.343 | 1400 | 80  | 0.05 | 0.07 | 0.01 |
| 517.479 | 2473.857 | 1400 | 100 | 0.05 | 0.07 | 0.01 |
| 517.312 | 2473.400 | 1400 | 120 | 0.06 | 0.08 | 0.01 |
| 517.000 | 2473.028 | 1400 | 140 | 0.09 | 0.10 | 0.01 |
| 516.579 | 2472.784 | 1400 | 160 | 0.14 | 0.12 | 0.03 |
| 516.100 | 2472.700 | 1400 | 180 | 0.27 | 0.18 | 0.09 |
| 515.621 | 2472.784 | 1400 | 200 | 0.35 | 0.30 | 0.13 |
| 515.200 | 2473.028 | 1400 | 220 | 0.34 | 0.38 | 0.22 |
| 514.888 | 2473.400 | 1400 | 240 | 0.27 | 0.32 | 0.31 |
| 514.721 | 2473.857 | 1400 | 260 | 0.15 | 0.19 | 0.21 |
| 514.721 | 2474.343 | 1400 | 280 | 0.06 | 0.15 | 0.15 |

|         |          |      |     |      |      |      |
|---------|----------|------|-----|------|------|------|
| 514.888 | 2474.800 | 1400 | 300 | 0.05 | 0.13 | 0.11 |
| 515.200 | 2475.172 | 1400 | 320 | 0.05 | 0.11 | 0.10 |
| 515.621 | 2475.416 | 1400 | 340 | 0.05 | 0.10 | 0.06 |
| 516.100 | 2475.700 | 1600 | 0   | 0.04 | 0.08 | 0.04 |
| 516.647 | 2475.604 | 1600 | 20  | 0.04 | 0.07 | 0.03 |
| 517.128 | 2475.326 | 1600 | 40  | 0.04 | 0.06 | 0.01 |
| 517.486 | 2474.900 | 1600 | 60  | 0.04 | 0.06 | 0.01 |
| 517.676 | 2474.378 | 1600 | 80  | 0.04 | 0.06 | 0.01 |
| 517.676 | 2473.822 | 1600 | 100 | 0.05 | 0.06 | 0.00 |
| 517.486 | 2473.300 | 1600 | 120 | 0.05 | 0.06 | 0.01 |
| 517.128 | 2472.874 | 1600 | 140 | 0.08 | 0.07 | 0.01 |
| 516.647 | 2472.596 | 1600 | 160 | 0.11 | 0.09 | 0.02 |
| 516.100 | 2472.500 | 1600 | 180 | 0.21 | 0.13 | 0.07 |
| 515.553 | 2472.596 | 1600 | 200 | 0.27 | 0.22 | 0.10 |
| 515.072 | 2472.874 | 1600 | 220 | 0.27 | 0.29 | 0.16 |
| 514.714 | 2473.300 | 1600 | 240 | 0.18 | 0.23 | 0.21 |
| 514.524 | 2473.822 | 1600 | 260 | 0.11 | 0.15 | 0.16 |
| 514.524 | 2474.378 | 1600 | 280 | 0.05 | 0.12 | 0.11 |
| 514.714 | 2474.900 | 1600 | 300 | 0.04 | 0.10 | 0.08 |
| 515.072 | 2475.326 | 1600 | 320 | 0.04 | 0.08 | 0.08 |
| 515.553 | 2475.604 | 1600 | 340 | 0.04 | 0.08 | 0.04 |
| 516.100 | 2475.900 | 1800 | 0   | 0.04 | 0.06 | 0.04 |
| 516.716 | 2475.791 | 1800 | 20  | 0.04 | 0.06 | 0.03 |
| 517.257 | 2475.479 | 1800 | 40  | 0.04 | 0.05 | 0.01 |
| 517.659 | 2475.000 | 1800 | 60  | 0.04 | 0.05 | 0.01 |
| 517.873 | 2474.413 | 1800 | 80  | 0.04 | 0.05 | 0.00 |
| 517.873 | 2473.787 | 1800 | 100 | 0.04 | 0.05 | 0.00 |
| 517.659 | 2473.200 | 1800 | 120 | 0.05 | 0.05 | 0.00 |
| 517.257 | 2472.721 | 1800 | 140 | 0.06 | 0.06 | 0.01 |
| 516.716 | 2472.409 | 1800 | 160 | 0.09 | 0.07 | 0.02 |
| 516.100 | 2472.300 | 1800 | 180 | 0.15 | 0.10 | 0.05 |
| 515.484 | 2472.409 | 1800 | 200 | 0.22 | 0.17 | 0.08 |
| 514.943 | 2472.721 | 1800 | 220 | 0.22 | 0.22 | 0.13 |
| 514.541 | 2473.200 | 1800 | 240 | 0.14 | 0.18 | 0.16 |
| 514.327 | 2473.787 | 1800 | 260 | 0.09 | 0.12 | 0.13 |
| 514.327 | 2474.413 | 1800 | 280 | 0.05 | 0.09 | 0.09 |
| 514.541 | 2475.000 | 1800 | 300 | 0.04 | 0.08 | 0.07 |
| 514.943 | 2475.479 | 1800 | 320 | 0.04 | 0.06 | 0.06 |
| 515.484 | 2475.791 | 1800 | 340 | 0.04 | 0.06 | 0.04 |
| 516.100 | 2476.100 | 2000 | 0   | 0.03 | 0.05 | 0.03 |
| 516.784 | 2475.979 | 2000 | 20  | 0.03 | 0.05 | 0.02 |
| 517.386 | 2475.632 | 2000 | 40  | 0.03 | 0.04 | 0.01 |
| 517.832 | 2475.100 | 2000 | 60  | 0.03 | 0.04 | 0.00 |
| 518.070 | 2474.447 | 2000 | 80  | 0.03 | 0.04 | 0.00 |

|         |          |      |     |      |      |      |
|---------|----------|------|-----|------|------|------|
| 518.070 | 2473.753 | 2000 | 100 | 0.04 | 0.04 | 0.00 |
| 517.832 | 2473.100 | 2000 | 120 | 0.04 | 0.04 | 0.00 |
| 517.386 | 2472.568 | 2000 | 140 | 0.05 | 0.05 | 0.01 |
| 516.784 | 2472.221 | 2000 | 160 | 0.07 | 0.06 | 0.01 |
| 516.100 | 2472.100 | 2000 | 180 | 0.11 | 0.08 | 0.04 |
| 515.416 | 2472.221 | 2000 | 200 | 0.17 | 0.13 | 0.06 |
| 514.814 | 2472.568 | 2000 | 220 | 0.18 | 0.18 | 0.10 |
| 514.368 | 2473.100 | 2000 | 240 | 0.11 | 0.15 | 0.13 |
| 514.130 | 2473.753 | 2000 | 260 | 0.08 | 0.09 | 0.11 |
| 514.130 | 2474.447 | 2000 | 280 | 0.04 | 0.08 | 0.08 |
| 514.368 | 2475.100 | 2000 | 300 | 0.04 | 0.06 | 0.06 |
| 514.814 | 2475.632 | 2000 | 320 | 0.03 | 0.05 | 0.05 |
| 515.416 | 2475.979 | 2000 | 340 | 0.03 | 0.05 | 0.03 |
| 516.100 | 2476.300 | 2200 | 0   | 0.03 | 0.04 | 0.03 |
| 516.852 | 2476.167 | 2200 | 20  | 0.03 | 0.04 | 0.02 |
| 517.514 | 2475.785 | 2200 | 40  | 0.03 | 0.04 | 0.01 |
| 518.005 | 2475.200 | 2200 | 60  | 0.03 | 0.03 | 0.00 |
| 518.267 | 2474.482 | 2200 | 80  | 0.03 | 0.03 | 0.00 |
| 518.267 | 2473.718 | 2200 | 100 | 0.03 | 0.03 | 0.00 |
| 518.005 | 2473.000 | 2200 | 120 | 0.04 | 0.03 | 0.00 |
| 517.514 | 2472.415 | 2200 | 140 | 0.04 | 0.04 | 0.00 |
| 516.852 | 2472.033 | 2200 | 160 | 0.06 | 0.05 | 0.01 |
| 516.100 | 2471.900 | 2200 | 180 | 0.09 | 0.06 | 0.04 |
| 515.348 | 2472.033 | 2200 | 200 | 0.14 | 0.11 | 0.05 |
| 514.686 | 2472.415 | 2200 | 220 | 0.15 | 0.15 | 0.09 |
| 514.195 | 2473.000 | 2200 | 240 | 0.10 | 0.12 | 0.11 |
| 513.933 | 2473.718 | 2200 | 260 | 0.07 | 0.08 | 0.10 |
| 513.933 | 2474.482 | 2200 | 280 | 0.04 | 0.06 | 0.06 |
| 514.195 | 2475.200 | 2200 | 300 | 0.03 | 0.05 | 0.05 |
| 514.686 | 2475.785 | 2200 | 320 | 0.03 | 0.04 | 0.05 |
| 515.348 | 2476.167 | 2200 | 340 | 0.03 | 0.04 | 0.02 |
| 516.100 | 2476.500 | 2400 | 0   | 0.03 | 0.03 | 0.02 |
| 516.921 | 2476.355 | 2400 | 20  | 0.03 | 0.03 | 0.01 |
| 517.643 | 2475.939 | 2400 | 40  | 0.03 | 0.03 | 0.01 |
| 518.178 | 2475.300 | 2400 | 60  | 0.03 | 0.03 | 0.00 |
| 518.464 | 2474.517 | 2400 | 80  | 0.03 | 0.03 | 0.00 |
| 518.464 | 2473.683 | 2400 | 100 | 0.03 | 0.03 | 0.00 |
| 518.178 | 2472.900 | 2400 | 120 | 0.03 | 0.03 | 0.00 |
| 517.643 | 2472.261 | 2400 | 140 | 0.04 | 0.03 | 0.00 |
| 516.921 | 2471.845 | 2400 | 160 | 0.05 | 0.04 | 0.01 |
| 516.100 | 2471.700 | 2400 | 180 | 0.07 | 0.05 | 0.03 |
| 515.279 | 2471.845 | 2400 | 200 | 0.11 | 0.09 | 0.04 |
| 514.557 | 2472.261 | 2400 | 220 | 0.13 | 0.12 | 0.08 |
| 514.022 | 2472.900 | 2400 | 240 | 0.08 | 0.10 | 0.10 |

|         |          |      |     |      |      |      |
|---------|----------|------|-----|------|------|------|
| 513.736 | 2473.683 | 2400 | 260 | 0.06 | 0.07 | 0.08 |
| 513.736 | 2474.517 | 2400 | 280 | 0.03 | 0.05 | 0.06 |
| 514.022 | 2475.300 | 2400 | 300 | 0.03 | 0.04 | 0.04 |
| 514.557 | 2475.939 | 2400 | 320 | 0.03 | 0.04 | 0.04 |
| 515.279 | 2476.355 | 2400 | 340 | 0.03 | 0.04 | 0.02 |
| 516.100 | 2476.700 | 2600 | 0   | 0.02 | 0.03 | 0.02 |
| 516.989 | 2476.543 | 2600 | 20  | 0.02 | 0.03 | 0.01 |
| 517.771 | 2476.092 | 2600 | 40  | 0.02 | 0.03 | 0.01 |
| 518.352 | 2475.400 | 2600 | 60  | 0.02 | 0.02 | 0.00 |
| 518.661 | 2474.551 | 2600 | 80  | 0.02 | 0.02 | 0.00 |
| 518.661 | 2473.649 | 2600 | 100 | 0.03 | 0.02 | 0.00 |
| 518.352 | 2472.800 | 2600 | 120 | 0.03 | 0.02 | 0.00 |
| 517.771 | 2472.108 | 2600 | 140 | 0.03 | 0.03 | 0.00 |
| 516.989 | 2471.657 | 2600 | 160 | 0.05 | 0.03 | 0.01 |
| 516.100 | 2471.500 | 2600 | 180 | 0.06 | 0.04 | 0.03 |
| 515.211 | 2471.657 | 2600 | 200 | 0.09 | 0.07 | 0.04 |
| 514.429 | 2472.108 | 2600 | 220 | 0.11 | 0.09 | 0.07 |
| 513.848 | 2472.800 | 2600 | 240 | 0.07 | 0.08 | 0.09 |
| 513.539 | 2473.649 | 2600 | 260 | 0.06 | 0.06 | 0.07 |
| 513.539 | 2474.551 | 2600 | 280 | 0.03 | 0.04 | 0.05 |
| 513.848 | 2475.400 | 2600 | 300 | 0.03 | 0.04 | 0.04 |
| 514.429 | 2476.092 | 2600 | 320 | 0.02 | 0.03 | 0.04 |
| 515.211 | 2476.543 | 2600 | 340 | 0.02 | 0.03 | 0.02 |
| 516.100 | 2476.900 | 2800 | 0   | 0.02 | 0.03 | 0.01 |
| 517.058 | 2476.731 | 2800 | 20  | 0.02 | 0.02 | 0.01 |
| 517.900 | 2476.245 | 2800 | 40  | 0.02 | 0.02 | 0.00 |
| 518.525 | 2475.500 | 2800 | 60  | 0.02 | 0.02 | 0.00 |
| 518.857 | 2474.586 | 2800 | 80  | 0.02 | 0.02 | 0.00 |
| 518.857 | 2473.614 | 2800 | 100 | 0.02 | 0.02 | 0.00 |
| 518.525 | 2472.700 | 2800 | 120 | 0.03 | 0.02 | 0.00 |
| 517.900 | 2471.955 | 2800 | 140 | 0.03 | 0.02 | 0.00 |
| 517.058 | 2471.469 | 2800 | 160 | 0.04 | 0.03 | 0.01 |
| 516.100 | 2471.300 | 2800 | 180 | 0.05 | 0.04 | 0.02 |
| 515.142 | 2471.469 | 2800 | 200 | 0.07 | 0.06 | 0.03 |
| 514.300 | 2471.955 | 2800 | 220 | 0.09 | 0.08 | 0.06 |
| 513.675 | 2472.700 | 2800 | 240 | 0.07 | 0.07 | 0.08 |
| 513.343 | 2473.614 | 2800 | 260 | 0.05 | 0.05 | 0.06 |
| 513.343 | 2474.586 | 2800 | 280 | 0.03 | 0.04 | 0.04 |
| 513.675 | 2475.500 | 2800 | 300 | 0.02 | 0.03 | 0.03 |
| 514.300 | 2476.245 | 2800 | 320 | 0.02 | 0.03 | 0.03 |
| 515.142 | 2476.731 | 2800 | 340 | 0.02 | 0.03 | 0.02 |
| 516.100 | 2477.100 | 3000 | 0   | 0.02 | 0.02 | 0.01 |
| 517.126 | 2476.919 | 3000 | 20  | 0.02 | 0.02 | 0.01 |
| 518.028 | 2476.398 | 3000 | 40  | 0.02 | 0.02 | 0.00 |

|         |          |      |     |      |      |      |
|---------|----------|------|-----|------|------|------|
| 518.698 | 2475.600 | 3000 | 60  | 0.02 | 0.02 | 0.00 |
| 519.054 | 2474.621 | 3000 | 80  | 0.02 | 0.02 | 0.00 |
| 519.054 | 2473.579 | 3000 | 100 | 0.02 | 0.02 | 0.00 |
| 518.698 | 2472.600 | 3000 | 120 | 0.02 | 0.02 | 0.00 |
| 518.028 | 2471.802 | 3000 | 140 | 0.03 | 0.02 | 0.00 |
| 517.126 | 2471.281 | 3000 | 160 | 0.03 | 0.03 | 0.00 |
| 516.100 | 2471.100 | 3000 | 180 | 0.04 | 0.03 | 0.02 |
| 515.074 | 2471.281 | 3000 | 200 | 0.06 | 0.04 | 0.02 |
| 514.172 | 2471.802 | 3000 | 220 | 0.08 | 0.06 | 0.05 |
| 513.502 | 2472.600 | 3000 | 240 | 0.06 | 0.06 | 0.07 |
| 513.146 | 2473.579 | 3000 | 260 | 0.04 | 0.04 | 0.04 |
| 513.146 | 2474.621 | 3000 | 280 | 0.02 | 0.03 | 0.03 |
| 513.502 | 2475.600 | 3000 | 300 | 0.02 | 0.03 | 0.02 |
| 514.172 | 2476.398 | 3000 | 320 | 0.02 | 0.02 | 0.03 |
| 515.074 | 2476.919 | 3000 | 340 | 0.02 | 0.02 | 0.01 |

**Table S4. Odour concentration values - 98th percentile on annual basis for Area source (Cuba)**
